# Supplementary material for: Cytochrome P450‐catalyzed biosynthesis of furanoditerpenoids in the bioenergy crop switchgrass (Panicum virgatum L.)
Source: PubMed Central journal article supplement (PMC9292899; doi:10.1111/tpj.15492), 2021-09-24
Supplement: TPJ-108-1053-s002.pdf [file TPJ-108-1053-s002.pdf]

**Supplementary Table 1:** Average and standard deviation for each interaction energy (IE) value of filtered docking poses for each P450-substrate combination. The global average IE for docking with the C15-hydroxy and C15,16-dihydroxy substrates suggests that only these two substrate species interact with the P450 active site. CPP = copalyl pyrophosphate.

| Substrate              | P450     | Functional Group  |             |                  |
|------------------------|----------|-------------------|-------------|------------------|
|                        |          | C15-pyrophosphate | C15-hydroxy | C15,16-dihydroxy |
| 8,13-CPP               | CYP71Z25 | -2.4±0.5          | -6.5±0.5    | -4.8±0.7         |
|                        | CYP71Z26 | -0.9±0.8          | -4.6±0.8    | -4.5±1.1         |
|                        | CYP71Z27 | -1.6±0.8          | -5.8±0.8    | -5.2±0.7         |
|                        | CYP71Z28 | -0.4±0.8          | -6.1±0.4    | -4.3±0.5         |
|                        | CYP71Z29 | -2.2±0.7          | -5.5±0.4    | -5.0±0.5         |
| (+) -CPP               | CYP71Z25 | -1.7±0.6          | -6.3±0.3    | -5.6±0.5         |
|                        | CYP71Z26 | -0.3±1.2          | -5.8±0.9    | -3.8±0.8         |
|                        | CYP71Z27 | -1.8±0.5          | -5.9±0.4    | -5.8±0.5         |
|                        | CYP71Z28 | -0.2±0.6          | -6.0±0.2    | -5.5±0.4         |
|                        | CYP71Z29 | -1.5±0.8          | -4.7±0.8    | -3.9±0.8         |
| <i>cis-trans</i> -CLPP | CYP71Z25 | -1.0±1.1          | -5.6±0.4    | -4.7±0.6         |
|                        | CYP71Z26 | -0.0±0.9          | -5.3±0.8    | -4.8±0.8         |
|                        | CYP71Z27 | -1.4±0.5          | -5.2±0.5    | -5.9±0.9         |
|                        | CYP71Z28 | -0.5±1.0          | -4.8±0.3    | -5.6±0.2         |
|                        | CYP71Z29 | -1.3±0.9          | -5.6±0.2    | -5.4±0.4         |
| <i>ent</i> -CPP        | CYP71Z25 | -1.5±0.4          | -6.4±0.2    | -5.6±0.2         |
|                        | CYP71Z26 | -0.2±0.9          | -5.4±0.7    | -3.6±0.6         |
|                        | CYP71Z27 | -1.2±0.6          | -6.1±0.5    | -6.2±0.4         |
|                        | CYP71Z28 | -0.2±0.5          | -5.5±0.4    | -4.2±0.5         |
|                        | CYP71Z29 | -0.9±1.3          | -5.7±0.7    | -3.6±0.8         |
| <i>syn</i> -CPP        | CYP71Z25 | -1.7±0.5          | -6.4±0.4    | -5.9±0.6         |
|                        | CYP71Z26 | -0.1±1.1          | -5.4±0.7    | -5.1±0.7         |
|                        | CYP71Z27 | -0.9±0.5          | -6.4±0.7    | -6.2±0.5         |
|                        | CYP71Z28 | -0.4±0.8          | -5.6±0.4    | -5.5±0.4         |
|                        | CYP71Z29 | -1.0±0.7          | -5.5±0.6    | -5.3±0.4         |
| Average                |          | -0.9±0.9          | -5.7±0.5    | -5.0±0.8         |

**Supplementary Table 2:** Synthetic genes used in this study.

**>CYP71Z25**

ATGGCTAAAAAGACATCCTCGAAAGGGAAACTCCCCCAGGGCCTCGCATGCTGCCC  
GTAATTGGGAGCTTACACCATCTCTTGAGTTCACCTCTGCTGTTCCGTGTCTTACGGG  
GTTTAGCGAAAAAGCATGGGCCACTGATGACATTGCGCTTAGGGGAAGTGCCGGCAC  
TGGTTGCGTCAAGCATGGAAGCAGCTCAGGCGATTCTTAAAGTGCACGACACTAATT  
TTGCAGATCGGTTCACTCCTGCGACTTTTGCCACCGTTCGCTTATGGTGGCACCAATCT  
GATATTGTCTCCGTACGGTGAACGGTGGCGGCATTTGAGAAAAATCGTTGTTTCAGGA  
GATGCTTACTGCAACGCGCGTCCAGAGCTTCAAACATATTAGACAGGAGGAAGTCGG  
TCGTTTCTTACACGGAATGGCTGCGAGCGCTGCCGCAGGGACTGCGGTAAACTTCTC  
CACAGCAGTATCTAAACTGATTAACGACGCCTTTCTGCGGGAGTGTGTGCGTTCGTA  
TGTAATATCAGGATGAATTCTTGGACGCCGTTACACGCGTCCCTCTTAGCATCTG  
GGGTGACAATCGCTGATTTGTATCCCTCTAGTAGAATTATGCAGATGCTGGGAACCGC  
ACCTCGTAAAGCCCTGGCGGTAAGACGTCGTGTTGATAGAATCGTTAAACAAATTATC  
CAAGAGGCAAAAAGAAGCAATGGAGTGTGACGATAAGACTGTCGATGATTCTTTTATT  
AGTCTGCTTCTCCGGCTGCAAAAAGAAGGGAGTATGCCGATACCGCTGACGAATGAG  
ACAATAATTGCGTTAATGTTTCGATATGTTGGCTGCGGGATCCGAAACATCATCAACCAC  
CTTGAATTGGGCACTAACTGAACTGATTTCGTAGCCAGCTGCTATGGCGCGCGCCCAA  
GCAGAAGTACGTGAAGCTTTCAAAGGAAAAAGTATTATAACGGATGACGACATCGCC  
AAATCAGGCATTTCTTACCTAAACTCGTGTTCAAGGAAACACTGCGTCTGCATCCGT  
CCTCACCGTTACTGATTCCGCGCCAATGCCGAGAAACCTGTCAGGTTATGGGCTATGA  
TATCCCGAAGGGGACAGCCGTTTTTTGTTAACGTGTGGGCAATTGGGAGAGATCCGTT  
GTACTGGGAAGATCCTGAAGAATTTAAGCCGGAACGGTTTGAACGAACAACCTGG  
ATTCAGAGGAACAAACTTTGAGTTCATACCGTTCGGTGCCTGGTTCGTCGGATGTGTCC  
AGGGATTAATCTGGGTCTGGCTAACATCGAACTTGCTTTAGCTTCCCTTTTATATCATT  
TGACTGGAAATTACCGAAAGGTATGGAACCTAAAGATGTTGAAATGCGTGAGGCTGT  
AGGTATGGTAGCGAGCAAAGAAACCAGCCTGATTGTCCATCCAGTCACATTTATTCCG  
CCTGCCGTTGCGGCGTGA

**>CYP71Z26**

ATGGCGAAAAAAACCTCTAGTAAAGGTAAGTTGCCTCCGGGACCACGGATGCTGCCG  
GTTATCGGATCCTTACACCACTTGCTCAGCTACCGCTGCTGTTCCGAGTTCTGCGGG  
GCCTCGCGAAAAAGCATGGGCCCTTTGATGACCCTACGATTAGGCGAAGTACCAGCTC  
TGGTGGCTAGTTCTATGGAAGCGGCTCAGGCAATTCTCAAAGTGCACGACACGAATT  
TTGCAGATCGGTTCACTCCCGCAACGTTTGCCACGGTGGCTTACGGCGGCACAAATTT  
GATACTAAGTCCATACGGCGAGCGTTGGCGCCATCTGCGTAAGATTGTTGTTTCAGGAG  
ATGCTCACAGCCACACGTGTTTCAGAGCTTTAAACATATCCGCCAGGAGGAGGTAGGC  
AGGTTTTTACAGGGGATGGCAGCATCTGCGGCTGCGGGCACTGCCGTAAACTTTTCC  
ACCGCAGTTAGCAAACCTGATTAACGACGCTTTCTTACGAGAATGCGTAGGCTCACGTT  
GTAAGTATCAAGACGAGTTTCTGGACGCCGTTTCATACGGCCAGTCTGCTGGCAAGTG  
GGGTCACCATCGCCGATCTCTATCCATCTAGTAGGATTATGCAGATGCTGGGAACAGC  
GCCGCGTAAAGCCCTAGCAGTTAGGCGTCGGGTTGACCGCATTGTGAAACAGATTATT  
CAGGAAGCAAAAAGAAGCGATGGAGTGTGACGATAAAACCGTTGACGACTCTTTTATT  
TCGCTGTTACTTCGCTTACAAAAAGAAGGATCGATGCCTATCCCTTTAACCAATGAAA  
CAATTATCGCCCTGATGTTTGACATGCTGGCCGCGGGTAGTGAAACTTCCAGTACAAC  
CCTGAACTGGGCTTTGACCGAGTTAATTCGCAGTCCGGCTGCCATGGCACGCGCCCA  
GGCAGAAGTTCGTGAAGCGTTCAAGGGAAAATCCATCATTACTGATGATGATATTGCA  
AAATCGGGTATTTCTTACCTGAAATTGGTGTTCAGGAAACGCTGAGACTACACCCAT  
CATCCCCTCTGCTGATTCTCGCCAGTGTGCTGAAACCTGTCAGGTGATGGGTTACGA  
TATCCGAAGGGTACTGCTGTATTTGTAAACGCTTGGGCAATTGGTTCGCGATCCGTTG

TATTGGGAAGATCCAGAAGAGTTTAAACCTGAACGCTTTGAAACTAATAACCTCGATT  
TCCGTGGTACTAACTTCGAATTCATACCTTTTGGTGCGGGGAGACGCATGTGTCCGGG  
CATAAACCTGGGGCTGGCGAATATTGAGCTAGCGCTGGCGTCTCTACTCTACCATTTC  
GATTGGAAGTTGCCGAAAGGTATGGAGCCGAAAGATGTGGAAATGAGAGAAGCCAC  
AGGAATGGTAGCTAGCAAAGAAACGAGCCTGATCGTGCATCCCGTAACCTTTATCCCA  
CCGGCGGTGGCGTGA

**>CYP71Z27**

ATGGCGAAAAAAACCAGTAGTAAAGGCCAACTTCCTCCGGGTCCACGTATGCTGCCA  
GTCATTGGAAGTCTTCATCATTTAGTGTCTGCACCGTTATTGTTTCGTGTACTGAGGGA  
ACTGGCTAAAAACATGGTCCTTTAATGATGTTACGCTTAGGGGAGGTTCCAGCTCTG  
GTTGCGAGCTCGATGGAGGCCGCCAGGCTATTCTTAAGGTTACGACACGAGCTTC  
GCAGATAGATATACACCTGCGACAAGTGCCACCATCGCTTATGGTGGCACTGATCTCA  
TTCTGAGCCCTTATGGTGAAGATGGCGTCACTTGCGCAAATTTGTGGTACAAGAAAT  
GCTGACTGCAACGAGAGTTCAGTCCTTTAAGTATATCCGCGAAGAGGAGGTCGCTAG  
ATTTTTGCAAGCGATGGCGGCGGCCGCTGCGACAGGGACAGCTGTCGATTTTTCCAC  
AGCAGTGGCTAAACTTGTGAACGACGCCTTTCTACGTGAATGTGTAGGTTCCCGGTG  
CAAATATCAGGACGAATACTTGGATGCAGTACATACCGTCACCCAGCTGGCCAGCGG  
GATAACCATCGCCGATCTGTATCCTTCTCTCGTATTATGCAAATGCTGGGTACAGCCC  
CACGGAAAGGTCTTGCATATCGTCAGCGTATTGACAGAATTTTGAACAGATCATCCA  
GGAAGCGAAAGAAGCTATGGAATGCGAAGACGAGACCGCTCATGAATCTTTTGTAAG  
TTTATTACTTCGGCTGCAAAAAGACGGGTCCATGCCTATCCCGCTGACGAACGAAACC  
ATAATCGCACTGATGTTTGATATGCTGGCCGCAGGAAGCGACACCTCAAGTACCATTC  
TGAACCTGGGCGATGACCGAACTGATACGTTCTCCGGCTGCAATGGCACGGGCGCAGG  
CAGAGGTTGAGAAAGCTTTTAAAGGTAAATCGATCATTACAGATGACGATATTGCCGA  
AAGCGGCATTAGTTATCTTAAACTGGTCTTCAAAGAAACACTGCGTCTGCATCCCACG  
TCTCCTTTACTCATACCAGTCAATGTGCGGAGACATGTCAAGTTATGGGGTACGACA  
TACCAAAGGAATGGCAGTTTTTTGTCAACGTTTGGGCAATTGGCCGTGATCCAAGCT  
ATTGGGATGACCCGGAAGAATTCAAACCGGAACGTTTCGAGACCAATAATCTGGACT  
TTCGTGGTACAACTTTGAATTCATTCCGTTTGGAGCCGGTCGTCGCATGTGTCCAGG  
TATAAATCTTGGTCTGGCAAACATCGAACTGGCATTAGCGTCTCTGCTGTATCATTTG  
ATTGGAACTGCCCAAAGGAATGGAACCGAAGGATGTGGATATGAGAGAAGCAGTA  
GGTATTGTTGCATCAAAGAGACCTCGTTAATTGTACATCCGGTTACGTTTATTCCATT  
GACCGTTGCAGCATAA

**>CYP71Z28**

ATGGCCAAAAAGACCAGCAGCAAAGGTAAACTGCCTCCTGGTCCGTGGATGCTGCCG  
GTTATTGGTAGCCTGCATCATCTGGTTAGCAGTCCGCTGCTGTTTCGTGTTCTGCGTGG  
TCTGGCAAAAAACATGGTCCGCTGATGACCCTGCGTTTTTGGTGAAGTTCCGGCACT  
GGTTGCAAGCAGCATGGAAGCAGCACAGGCAATTCTGAAAGTTAATGATACCCGTTT  
TGCCGATCGTTTTGCACCGGCAACCAGCGCAACCATTACCTATGGTGCAACCAATCTG  
ATTCTGAGCCCGTATGGTGAACGTTGGCGTCAGCTGCGTAAAATTGTTGTTCAAGAAA  
TGCTGACCACCACACGTGTTTCAAGGCTTTAAACATATTCGTCAAGAAGAAGTTGCC  
GTTTTCTGCAAGGTATGGCAGCAGCAGCCGCAAATGGCACCGCAGTTGATTTTTCAA  
CCGCAAGTTAGCAAACCTGGTGAATGATACCTTTCTGCGTGAATGTGTTGGTAGCCGTTG  
TAAATATCAGGATGAATTTCTGGATGCAGTTCATACCGCAAGTCAGCTGGCAAGCGGT  
ATTACCATTGCAGATCTGTATCCGAGCAGCCGTATTATGCAGATGCTGGGCACCGCAC  
CGCGTAAAGGTCTGGCATGTCTGTCAGCGTATTGATCGTATTCTGCGTCAGATTATCAA  
GAGGCAAAAAGAAGCAATGGAATGCGACGATAAAACCGCACATGAAAGCTTTGTTAG  
CCTGCTGTTACGTCTGCAGAAAGATGGTAGCATGCCGATTCCGCTGACCAATGAAACC  
ATTATTGCACTGATGTTTGATATGCTGGCAGCAGGTAGCGATACCAGCAGTACCATTCT  
GAATTGGGCAATGACCGAACTGATTCGTAGCCCGACCGCAATGGCACGTGCACAGGC

AGAAGTTCGTCAGGCATTTAAAGGTAAAAGCATCATTACCGATGATGACATGGCCAAA  
TCAGGTATCAGCTATCTGAAACTGGTGTTCAAAGAAACCCTGCGTCTGCATCCGACCT  
CACCGCTGCTGATTCCGCGTCAGTGTTCGTGAAACCTGTCAGGTTATGGGTTATGATATT  
CCGAAAGGTACAGCCGTTTTTGTAAATGTTTGGGCAATTGGTCGTGATCCGAGCTATT  
GGGAAGATGCAGAAGATTTTAAACCGGAACGCTTTGAAACCAACAATCTGGATTTTC  
GTGGCACCAACTTTGAATTTATTCCGTTTGGTGCAGGTCGTCGTATGTGTCCGGGTATT  
AATCTGGGTTTAGCAAATATTGAACTGGCACTGGCAAGTCTGCTGTATCATTTTGATTG  
GAAACTGCCGAAAGGCATGGAACCGAAAGATGTGGATATGCGCGAAGTTGTTGGTAT  
GGTTGCATCAAAGAAACCAGCCTGACCGTTCATCCGGTTACCTTTATTCCGCCTGCA  
GTTGTTAA

**>CYP71Z25:MRS**

ATGGCTAAAAGACATCCTCGAAAGGGAAACTCCCCCAGGGCCTCGCATGCTGCCC  
GTAATTGGGAGCTTACACCATCTCTTGAGTTCACCTCTGCTGTTCCGTGTCTTACGGG  
GTTTAGCGAAAAAGCATGGGCCACTGATGACATTGCGCTTAGGGGAAGTGCCGGCAC  
TGTTGCGTCAAGCATGGAAGCAGCTCAGGCGATTCTTAAAGTGCACGACACTAATT  
TTGCAGATCGGTACACTCCTGCGACTTCTGCCACCATCGCTTATGGTGGCACCATCT  
GATATTGTCTCCGTACGGTGAACGGTGGCGGCATTTGAGAAAAATCGTTGTTTCAGGA  
GATGCTTACTGCAACGCGCGTCCAGAGCTTCAAACATATTAGACAGGAGGAAGTCGG  
TCGTTTCTTACACGGAATGGCTGCGAGCGCTGCCGCAGGGACTGCGGTAAACTTCTC  
CACAGCAGTATCTAAACTGATTAACGACGCCTTTCTGCGGGAGTGTGTTCGGTTCTCGA  
TGTAATATCAGGATGAATTCTTGGACGCCGTTACACGGCGACCCAGTTAGCATCTG  
GGGTGACAATCGCTGATTTGTATCCCTCTAGTAGAATTATGCAGATGCTGGGAACCGC  
ACCTCGTAAAGGCCTGGCGTATAGACAGCGTGTGATAGAATCCTGAAACAAATTATC  
CAAGAGGCAAAAGAAGCAATGGAGTGTGACGATAAGACTGTTCGATGATTCTTTTATT  
AGTCTGCTTCTCCGGCTGCAAAAAGAAGGGAGTATGCCGATACCGCTGACGAATGAG  
ACAATAATTGCGTTAATGTTTCGATATGTTGGCTGCGGGATCCGATAACATCAACCAT  
CTTGAATTGGGCAATGACTGAACTGATTTCGTAGCCCAGCTGCTATGGCGCGCGCCCAA  
GCAGAAGTACGTGAAGCTTTCAAAGGAAAAAGTATTATAACGGATGACGACATCGCC  
AAATCAGGCATTTCTTACCTAAACTCGTGTTCAAGGAAACACTGCGTCTGCATCCGA  
CCTCACCGTACTGATTCCGCGCCAATGCCGAGAAACCTGTCAGGTTATGGGCTATGA  
TATCCCGAAGGGGACAGCCGTTTTTGTAAACGTGTGGGCAATTGGGAGAGATCCGTT  
GTACTGGGAAGATCCTGAAGAATTTAAGCCGGAACGGTTTGAACGAACAACCTGG  
ATTTTCAGAGGAACAAACTTTGAGTTCATACCGTTCGGTGCCGGTCGTTCGGATGTGTCC  
AGGGATTAATCTGGGTCTGGCTAACATCGAACTTGCTTTAGCTTCCCTTTTATATCATT  
TGACTGGAAATTACCGAAAGGTATGGAACCTAAAGATGTTGAAATGCGTGAGGCTGT  
AGGTATCGTAGCGAGCAAAGAAACCAGCCTGATTGTCCATCCAGTACATTTATTCCG  
CCTGCCGTTGCGGCGTGA

**>CYP71Z27:MRS**

ATGGCGAAAAAAACCAGTAGTAAAGGCAAACCTCCTCCGGGTCCACGTATGCTGCCA  
GTCATTGGAAGTCTTCATCATTAGTGTTCGTACCGTATTGTTTCGTGTACTGAGGGA  
ACTGGCTAAAAACATGGTCCTTTAATGATGTTACGCTTAGGGGAGGTTCCAGCTCTG  
GTTGCGAGCTCGATGGAGGCCGCCAGGCTATTCTTAAGGTTACGACACGAGCTTC  
GCAGATAGATTTACACCTGCGACATTTGCCACCGTCGCTTATGGTGGCACTAATCTCAT  
TCTGAGCCCTTATGGTGAAGATGGCGTCACTTGCGCAAATTTGTGGTACAAGAAAT  
GCTGACTGCAACGAGAGTTCAGTCCCTTAAAGTATATCCGCGAAGAGGAGGTCGCTAG  
ATTTTTGCAAGCGATGGCGGCGGCCGCTGCGACAGGGACAGCTGTTCGATTTTTCCAC  
AGCAGTGGCTAAACTTGTGAACGACGCCTTTCTACGTGAATGTGTAGGTTCCCGGTG  
CAAATATCAGGACGAATACTTGGATGCAGTACATACCGTCTCCCTGCTGGCCAGCGGG  
ATAACCATCGCCGATCTGTATCCTTCTTCGTATTATGCAAATGCTGGGTACAGCCCC  
ACGGAAGCTCTTGCAGTTCGTTCGTATTGACAGAATTGTGAAACAGATCATCCA

GGAAGCGAAAGAAGCTATGGAATGCGAAGACGAGACCGCTCATGAATCTTTTGTAAG  
TTTATTACTTCGGCTGCAAAAAGACGGGTCCATGCCTATCCCGCTGACGAACGAAACC  
ATAATCGCACTGATGTTTGATATGCTGGCCGCAGGAAGCGAAACCTCAAGTACCACTC  
TGA ACTGGGCGCTGACCGAACTGATACGTTCTCCGGCTGCAATGGCACGGGCGCAGG  
CAGAGGTTTCGAGAAGCTTTTAAAGGTAAATCGATCATTACAGATGACGATATTGCCGA  
AAGCGGCATTAGTTATCTTAAACTGGTCTTCAAAGAAACACTGCGTCTGCATCCCTCG  
TCTCCTTTACTCATACCACGTCAATGTCTGGGAGACATGTCAAGTTATGGGGTACGACA  
TACCAAAGGAATGGCAGTTTTTGTCAACGTTTGGGCAATTGGCCGTGATCCAAGCT  
ATTGGGATGACCCGGAAGAATTCAAACCGGAACGTTTCGAGACCAATAATCTGGACT  
TTCGTGGTACAACTTTGAATTCATTCCGTTTGGAGCCGGTCGTCGCATGTGTCCAGG  
TATAAATCTTGGTCTGGCAAACATCGAACTGGCATTAGCGTCTCTGCTGTATCATTTG  
ATTGGAACTGCCCAAAGGAATGGAACCGAAGGATGTGGATATGAGAGAAGCAGTA  
GGTATGGTTGCATCAAAGAGACCTCGTTAATTGTACATCCGGTTACGTTTATTCCATT  
GACCGTTGCAGCATAA

**Supplementary Table 3:** Oligonucleotides used in this study.

| Primer name      | Sequence (with mutated position underlined)   |
|------------------|-----------------------------------------------|
| CYP71Z25-F86S-F  | CGGTTCACTCCTGCGACT <u>T</u> CTGCCACCGTCGCTTAT |
| CYP71Z25-F86S-R  | ATAAGCGACGGTGGC <u>A</u> GAAGTCGCAGGAGTGAACCG |
| CYP71Z27-S86F-F  | AGATATACACCTGCGAC <u>A</u> TTTGCCACCATCGCTTAT |
| CYP71Z27-S86F-R  | ATAAGCGATGGTGGC <u>A</u> AATGTCGCAGGTGTATATCT |
| CYP71Z25-N95D-F  | GTCGCTTATGGTGGCACC <u>G</u> ATCTGATATTGTCTCCG |
| CYP71Z25-N95D-R  | CGGAGACAATATCAG <u>A</u> TCGGTGCCACCATAAGCGAC |
| CYP71Z27-D95N-F  | ATCGCTTATGGTGGCA <u>T</u> AATCTCATTCTGAGCCCT  |
| CYP71Z27-D95N-R  | AGGGCTCAGAATGAG <u>A</u> TAGTGCCACCATAAGCGAT  |
| CYP71Z25-E283D-F | ATGTTGGCTGCGGGATCC <u>G</u> ATACATCATCAACCACC |
| CYP71Z25-E283D-R | GGTGGTTGATGATG <u>T</u> ATCGGATCCCGCAGCCAACAT |
| CYP71Z27-D283E-F | ATGCTGGCCGCAGGAAGC <u>G</u> AAACCTCAAGTACCATT |
| CYP71Z27-D283E-R | AATGGTACTTGAGGTTTCGCTTCCTGCGGCCAGCAT          |
| CYP71Z25-T288I-F | TCCGAAACATCATCAACC <u>A</u> CTTGAATTGGGCACTA  |
| CYP71Z25-T288I-R | TAGTGCCCAATTCAAG <u>A</u> TGGTTGATGATGTTTCGGA |
| CYP71Z27-I288T-F | AGCGACACCTCAAGTACC <u>A</u> CTCTGAACTGGGCGATG |
| CYP71Z27-I288T-R | CATCGCCAGTTCAG <u>A</u> GTGGTACTTGAGGTGTCGCT  |
| CYP71Z25-S346T-F | ACACTGCGTCTGCATCC <u>G</u> ACCTCACCGTTACTGATT |
| CYP71Z25-S346T-R | AATCAGTAACGGTGAG <u>G</u> TCGGATGCAGACGCAGTGT |
| CYP71Z27-T346S-F | ACACTGCGTCTGCATCC <u>C</u> TCGTCTCCTTTACTCATA |
| CYP71Z27-T346S-R | TATGAGTAAAGGAGAC <u>G</u> AGGGATGCAGACGCAGTGT |
| CYP71Z25-S347T-F | CGTCTGCATCCGTCC <u>A</u> CTCCGTTACTGATTCCG    |
| CYP71Z25-S347T-R | CGGAATCAGTAACGG <u>A</u> GTGGACGGATGCAGACG    |
| CYP71Z27-S347T-F | CGTCTGCATCCACG <u>A</u> CTCCTTTACTCATAACCA    |
| CYP71Z27-S347T-R | TGGTATGAGTAAAGG <u>A</u> GTTCGTGGGATGCAGACG   |
| CYP71Z25-M463I-F | CGTGAGGCTGTAGGT <u>A</u> TTGTAGCGAGCAAAGAA    |
| CYP71Z25-M463I-R | TTCTTTGCTCGCTACA <u>A</u> TACCTACAGCCTCACG    |
| CYP71Z27-I463M-F | AGAGAAGCAGTAGGT <u>A</u> TGGTTGCATCAAAAGAG    |
| CYP71Z27-I463M-R | CTCTTTTGATGCAACC <u>A</u> TACCTACTGCTTCTCT    |

**Supplementary Table 4:** Abbreviations and Accession numbers for proteins used for phylogenetic studies.

| <b>Protein name</b> | <b>Species</b>          | <b>Accession</b>             |
|---------------------|-------------------------|------------------------------|
| OsCYP71Z6           | <i>Oryza sativa</i>     | A3A871                       |
| OsCYP71Z7           | <i>Oryza sativa</i>     | Q6YV88                       |
| ZmCYP71Z16          | <i>Zea mays</i>         | Zm00001d014136               |
| ZmCYP71Z18          | <i>Zea mays</i>         | Zm00001d014134               |
| OsCYP76M6           | <i>Oryza sativa</i>     | XP_015625955                 |
| OsCYP76M7           | <i>Oryza sativa</i>     | XP_015623593                 |
| OsCYP99A3           | <i>Oryza sativa</i>     | XP_015634021                 |
| OsCYP701A6          | <i>Oryza sativa</i>     | XP_015643248                 |
| OsCYP701A8          | <i>Oryza sativa</i>     | XP_015640905                 |
| ZmCYP701A26         | <i>Zea mays</i>         | Zm00001d046342               |
| ZmCYP701A43         | <i>Zea mays</i>         | Zm00001d046344               |
| PvCYP71Z25          | <i>Panicum virgatum</i> | Pavir.1KG341400 <sup>1</sup> |
| PvCYP71Z26          | <i>Panicum virgatum</i> | Pavir.1KG382300 <sup>1</sup> |
| PvCYP71Z27          | <i>Panicum virgatum</i> | Pavir.1KG382400 <sup>1</sup> |
| PvCYP71Z28          | <i>Panicum virgatum</i> | Pavir.1NG304500 <sup>1</sup> |
| PvCYP71Z29          | <i>Panicum virgatum</i> | Pavir.1NG309700 <sup>1</sup> |
| PhA02218            | <i>Panicum hallii</i>   | Pahal.1G276500 <sup>2</sup>  |
| PhA02220            | <i>Panicum hallii</i>   | Pahal.1G276700 <sup>2</sup>  |

<sup>1</sup> Accession number for *Panicum virgatum* genome assembly v4.1 ([www.phytozome.org](http://www.phytozome.org))

<sup>2</sup> Accession number for *Panicum hallii* genome assembly v3.1 ([www.phytozome.org](http://www.phytozome.org))
