# Supplementary material for: Cytochrome P450‐catalyzed biosynthesis of furanoditerpenoids in the bioenergy crop switchgrass (Panicum virgatum L.)
Source: PubMed Central journal article supplement (PMC9292899; doi:10.1111/tpj.15492), 2021-09-24
Supplement: TPJ-108-1053-s003.pdf [file TPJ-108-1053-s003.pdf]

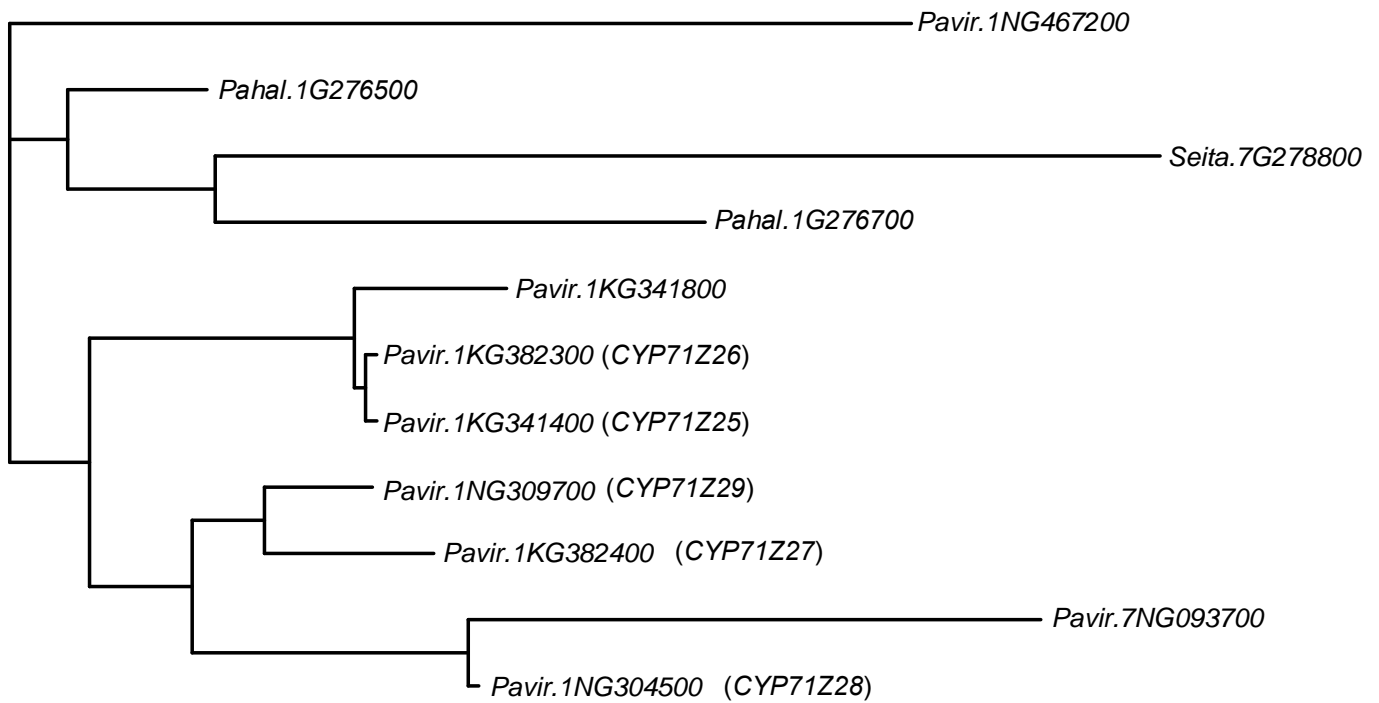

**Supplementary Fig. 1:** Orthology network of *Panicum virgatum* CYP71Z25-29 paralogs identified in the genomes of *Panicum halli* (v3.1) and *Setaria italica* (v2.2) (<https://phytozome.jgi.doe.gov>). The genes *Pahal.1G276500* and *Pahal.1G276700* derived from the unclustered *P. halli* genome v3.1 are identical to *Pahal.A02218* and *Pahal.A02220* derived from the cluster *P. halli* genome v2.0 used for analysis of genome localization (Fig. 2).

### Native *Panicum virgatum* diterpenoid products

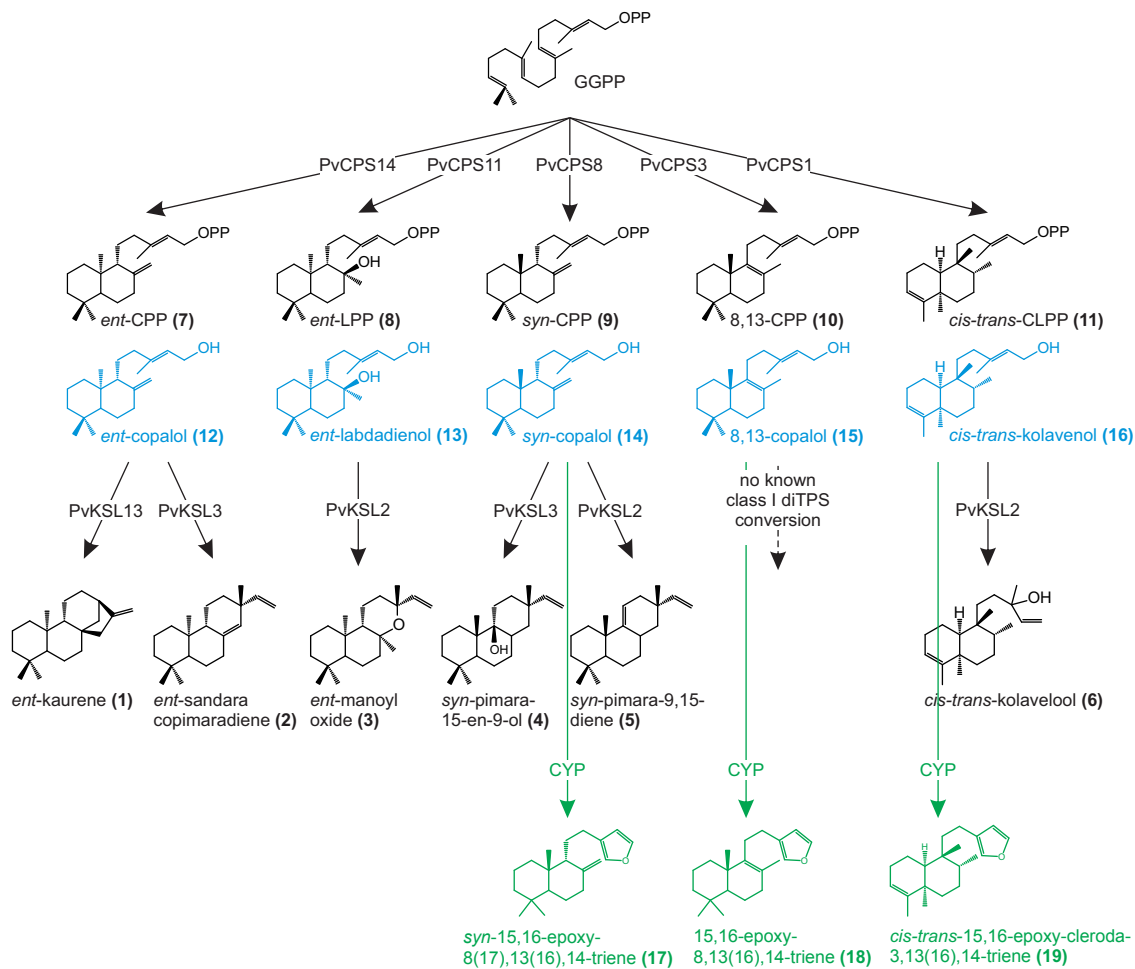

### Nonnative diterpenoid products

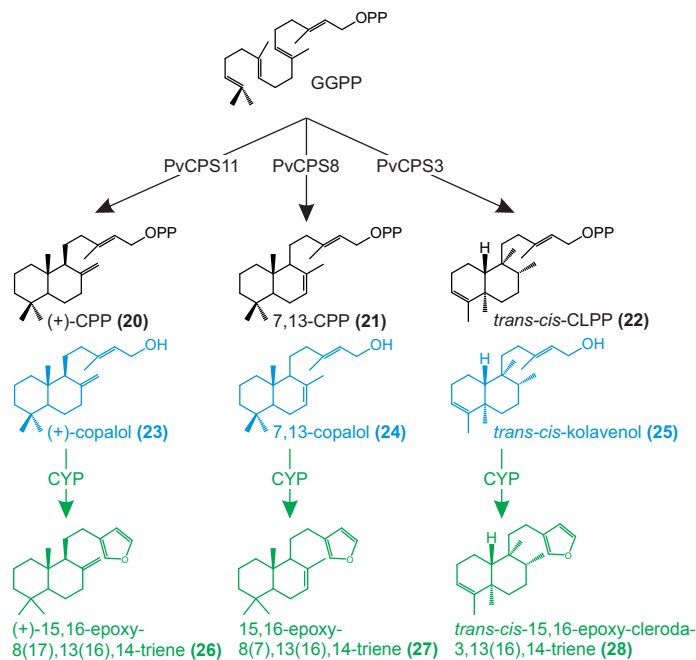

**Supplementary Fig. 2.** Diterpenoid-metabolic pathways and compounds relevant to this study. Shown are native and nonnative diterpenoid products and corresponding class II and class I diterpene synthases used for the functional analysis of the cytochrome P450 monooxygenases, CYP71Z25-29, in this study. Abbreviations: GGPP, geranylgeranyl pyrophosphate; CPP, copalyl pyrophosphate; LPP, labdadienyl pyrophosphate; CLPP, clerodieryl pyrophosphate; CPS, copalyl diphosphate synthase; KSL, kaurene synthase-like. Blue: alcohol derivatives of corresponding class II diterpene synthase products through the activity of endogenous *E. coli* phosphatases; green: CYP71Z25-29 products from the corresponding class II diterpene synthase alcohol products (12-16, 23-25). Structures of products 26-28 are tentatively assigned based on the structure of the respective class II diterpene synthase products.

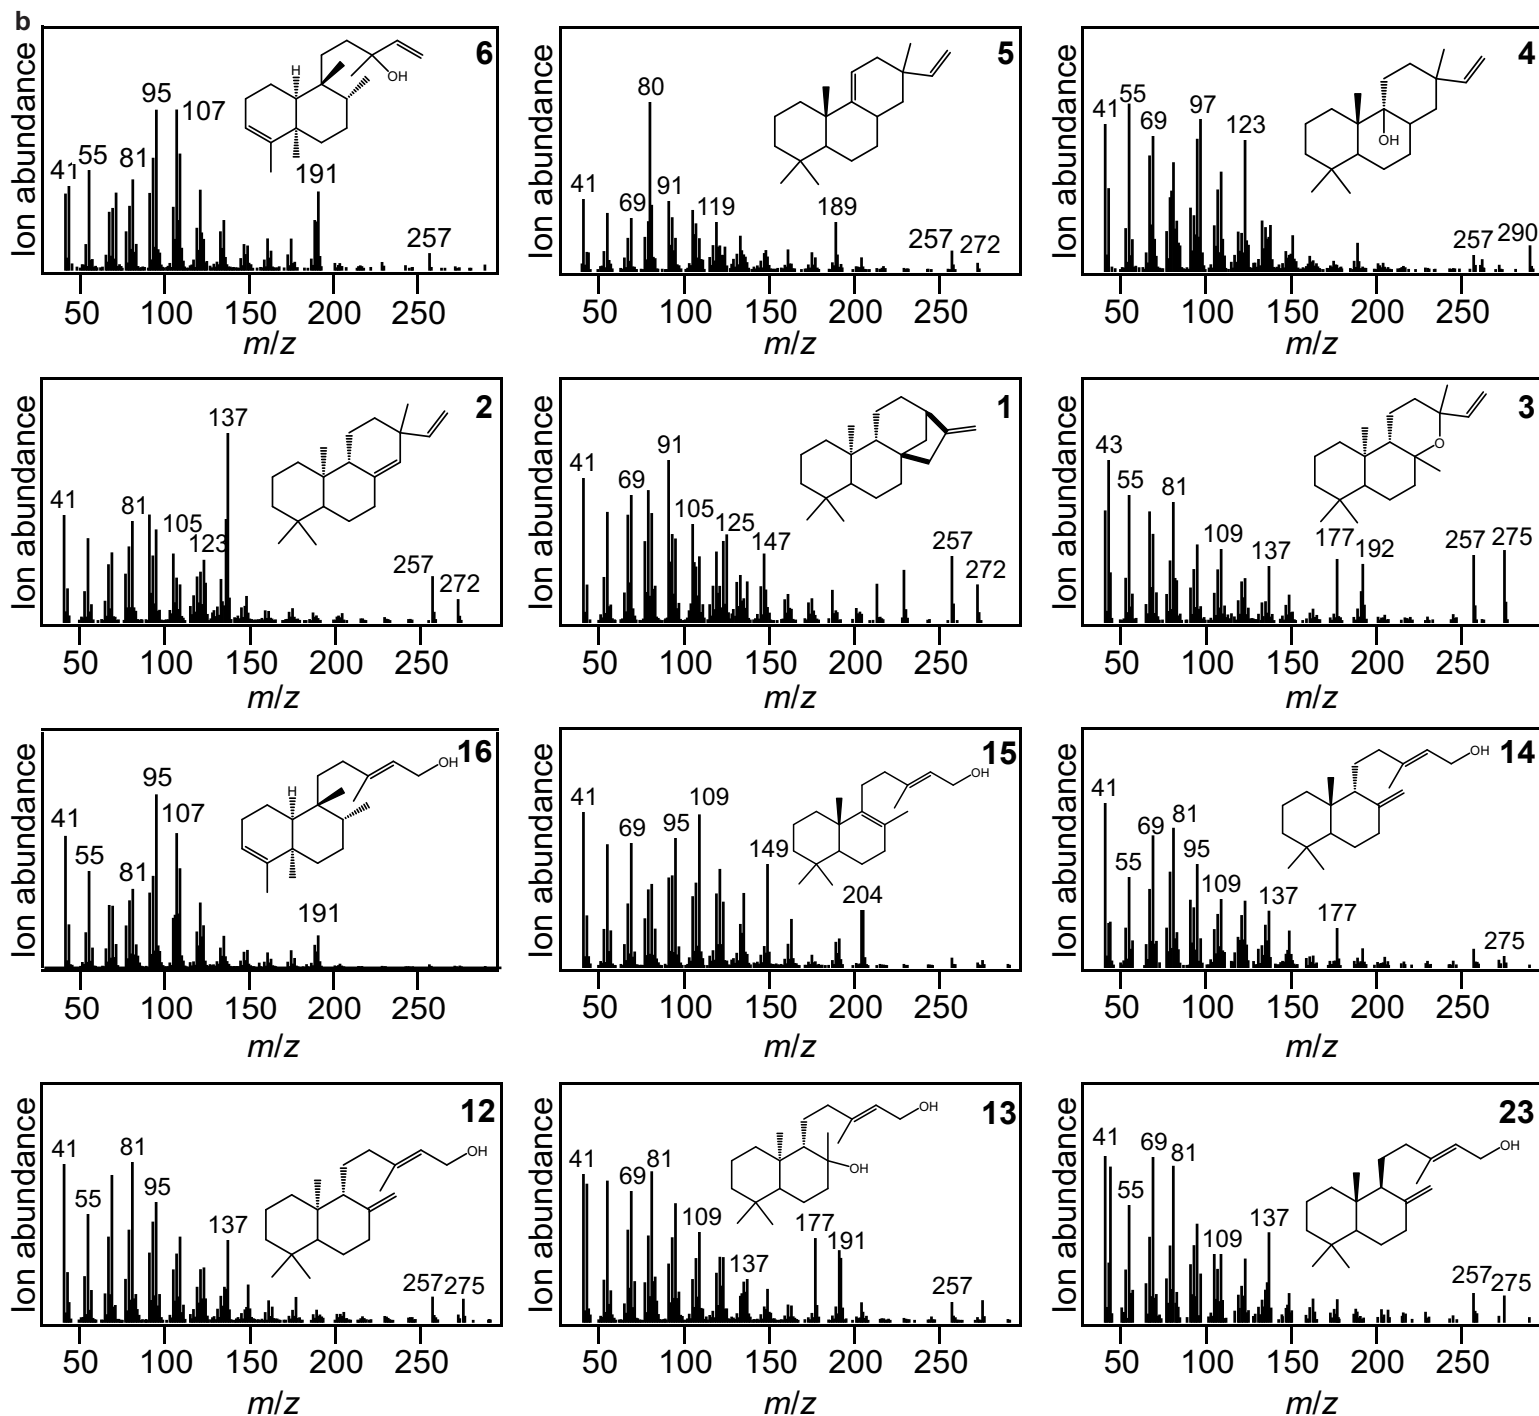

**Supplementary Fig. 3.** Extracted ion GC-MS mass spectra of relevant products resulting from *E. coli* co-expression of each P450 candidate (CYP71Z25-29) with pairs of diterpene synthases producing core switchgrass diterpene scaffolds. 6, *cis-trans*-kolavelool; 5, *syn*-pimara-9,15-diene; 4, *syn*-pimara-15-ene-9-ol; 2, *ent*-sandracopimaradiene; 1, *ent*-kaurene; 3, *ent*-manoyl oxide; 16, *cis-trans*-kolavenol (i.e. dephosphorylated *cis-trans*-CLPP); 14, *syn*-copalol (i.e. dephosphorylated *syn*-CPP); 12, *ent*-copalol (i.e. dephosphorylated *ent*-CPP); 13, *ent*-labda-8,15-diol (i.e. dephosphorylated *ent*-LPP); 15, 8,13-copalol (i.e. dephosphorylated 8,13-CPP); 23, (+)-copalol (i.e. dephosphorylated (+)-CPP).

**Supplementary Fig 4.** NMR analysis of *syn*-15,16-epoxy-8(17),13(16),14-triene (**17**).

Assigned  $^{13}\text{C}$  and  $^1\text{H}$  chemical shifts for **17** (201 MHz and 800 MHz respectively,  $\text{CDCl}_3$  solvent). The structure for **17** was numbered (A) and determined by the selected 2D NMR NOESY, HMBC and COSY correlations (B).

| <i>syn</i> -15,16-epoxy-8(17),13(16),14-triene ( <b>17</b> ) |                           |                           |                 |
|--------------------------------------------------------------|---------------------------|---------------------------|-----------------|
| Position                                                     | $\delta_{\text{C}}$ (ppm) | $\delta_{\text{H}}$ (ppm) | J (Hz)          |
| 1 a                                                          | 36.74                     | 1.05 (dq)                 | 12.5, 2.8       |
| b                                                            |                           | 1.54 (m)                  |                 |
| 2 a                                                          | 19.13                     | 1.43 (dt)                 | 13.3, 3.5       |
| b                                                            |                           | 1.63 (m)                  |                 |
| 3 a                                                          | 42.66                     | 1.15 (td)                 | 13.3, 3.5       |
| b                                                            |                           | 1.40 (m)                  |                 |
| 4                                                            | 33.23                     |                           |                 |
| 5                                                            | 45.80                     | 1.30 (m)                  |                 |
| 6 a                                                          | 23.64                     | 1.32 (m)                  |                 |
| b                                                            |                           | 1.63 (m)                  |                 |
| 7 a                                                          | 31.59                     | 2.10 (m)                  |                 |
| b                                                            |                           | 2.20 (m)                  |                 |
| 8                                                            | 149.08                    |                           |                 |
| 9                                                            | 57.80                     | 1.60 (m)                  |                 |
| 10                                                           | 37.95                     |                           |                 |
| 11 a                                                         | 26.69                     | 1.58 (m)                  |                 |
| b                                                            |                           | 1.79 (m)                  |                 |
| 12 a                                                         | 23.37                     | 2.14 (m)                  |                 |
| b                                                            |                           | 2.33 (ddd)                | 14.6, 10.6, 4.2 |
| 13                                                           | 125.52                    |                           |                 |
| 14                                                           | 111.07                    | 6.27 (br s)               |                 |
| 15                                                           | 142.56                    | 7.34 (t)                  | 1.7             |
| 16                                                           | 138.73                    | 7.20 (br s)               |                 |
| 17 a                                                         | 109.63                    | 4.54 (dd)                 | 2.4, 1.7        |
| b                                                            |                           | 4.73 (t)                  | 2.4             |
| 18                                                           | 33.49                     | 0.87 (s)                  |                 |
| 19                                                           | 22.16                     | 0.81 (s)                  |                 |
| 20                                                           | 22.33                     | 0.92 (s)                  |                 |

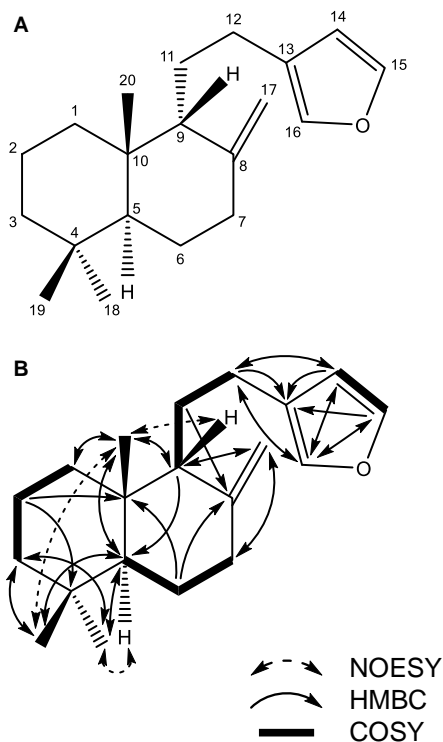

$^{13}\text{C}$  NMR spectrum of **17** (201 MHz,  $\text{CDCl}_3$  solvent).

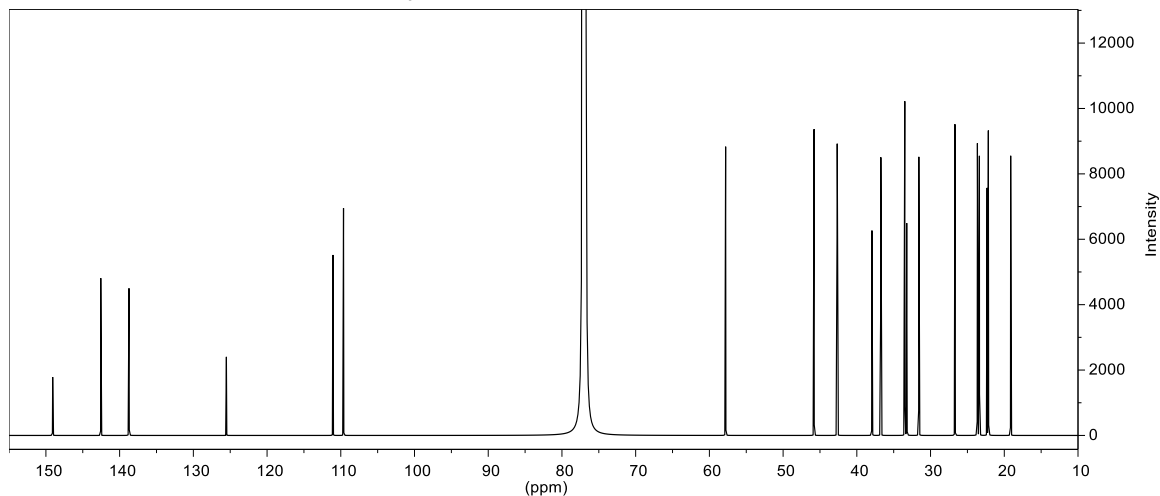

**Supplementary Fig. 4, continued**

The majority of the bicyclic decalin <sup>13</sup>C and <sup>1</sup>H NMR chemical shifts of **17** were in agreement (highlighted by \*) with the corresponding class II diTPS product of *syn*-copalol (**14**; Yee & Coates (1992) *J. Org. Chem.* 17, 4598-4608).

|          | (17)             | (14)             | (17)             | (14)             |
|----------|------------------|------------------|------------------|------------------|
| Position | $\delta_C$ (ppm) | $\delta_C$ (ppm) | $\delta_H$ (ppm) | $\delta_H$ (ppm) |
| 1 a      | 36.74*           | 36.76*           | 1.05 (dq)        | 1.05 (br d)      |
| b        |                  |                  | 1.54 (m)*        | 1.57*            |
| 2 a      | 19.13*           | 19.15*           | 1.43 (dt)*       | 1.45*            |
| b        |                  |                  | 1.63 (m)*        | 1.61*            |
| 3 a      | 42.66*           | 42.68*           | 1.15 (td)*       | 1.17 (td)*       |
| b        |                  |                  | 1.40 (m)*        | 1.38*            |
| 4        | 33.23*           | 33.21*           |                  |                  |
| 5        | 45.80*           | 45.78*           | 1.30 (m)*        | 1.26*            |
| 6 a      | 23.64*           | 23.64*           | 1.32 (m)*        | 1.30*            |
| b        |                  |                  | 1.63 (m)*        | 1.59*            |
| 7 a      | 31.59*           | 31.56*           | 2.10 (m)*        | 2.06*            |
| b        |                  |                  | 2.20 (m)         | 2.17 (br d)      |
| 8        | 149.08*          | 149.20*          |                  |                  |
| 9        | 57.80*           | 57.90*           | 1.60 (m)         | 1.50             |
| 10       | 37.95*           | 38.00*           |                  |                  |
| 11 a     | 26.69            | 24.46            | 1.58 (m)         | 1.47             |
| b        |                  |                  | 1.79 (m)         | 1.62             |
| 12 a     | 23.37            | 38.15            | 2.14 (m)         | 1.74             |
| b        |                  |                  | 2.33 (ddd)       | 1.90             |
| 13       | 125.52           | 140.58           |                  |                  |
| 14       | 111.07           | 122.94           | 6.27 (br s)      | 5.41 (tq)        |
| 15       | 142.56           | 59.44            | 7.34 (t)         | 4.15 (d)         |
| 16       | 138.73           | 16.52            | 7.20 (br s)      | 1.67             |
| 17 a     | 109.63*          | 109.44*          | 4.54 (dd)*       | 4.51 (dd)*       |
| b        |                  |                  | 4.73 (t)*        | 4.69 (t)*        |
| 18       | 33.49*           | 33.49*           | 0.87 (s)*        | 0.87*            |
| 19       | 22.16*           | 22.15*           | 0.81 (s)*        | 0.80*            |
| 20       | 22.33*           | 22.35*           | 0.92 (s)         | 0.91 (d)         |

<sup>1</sup>H NMR spectrum of **17** (800 MHz, CDCl<sub>3</sub> solvent).

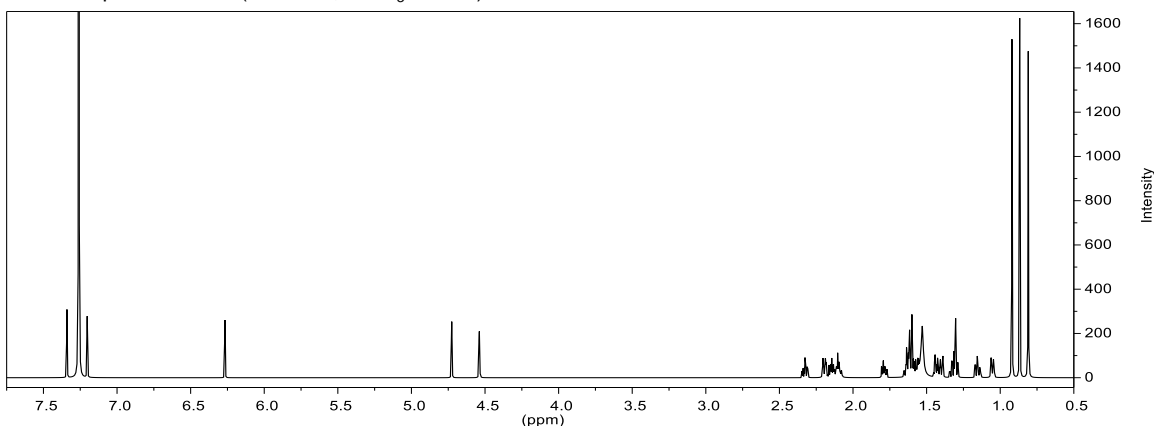

**Supplemental Fig 5.** NMR analysis of 15,16-epoxy-8,13(16),14-triene (compound **18**).

Assigned  $^{13}\text{C}$  and  $^1\text{H}$  chemical shifts for **18** (201 MHz and 800 MHz respectively,  $\text{CDCl}_3$  solvent). The structure for **18** was numbered (**A**) and determined by the selected 2D NMR NOESY, HMBC and COSY correlations (**B**).

| (15,16-epoxy-8,13(16),14-triene ( <b>18</b> )) |                           |                           |                 |
|------------------------------------------------|---------------------------|---------------------------|-----------------|
| Position                                       | $\delta_{\text{C}}$ (ppm) | $\delta_{\text{H}}$ (ppm) | J (Hz)          |
| 1 a                                            | 37.02                     | 1.21 (td)                 | 12.9, 3.7       |
| b                                              |                           | 1.87 (m)                  |                 |
| 2 a                                            | 19.07                     | 1.50 (dt)                 | 13.7, 4.0       |
| b                                              |                           | 1.62 (m)                  |                 |
| 3 a                                            | 41.81                     | 1.17 (td)                 | 13.7, 4.0       |
| b                                              |                           | 1.42 (m)                  |                 |
| 4                                              | 33.35                     |                           |                 |
| 5                                              | 51.91                     | 1.15 (dd)                 | 12.7, 2.0       |
| 6 a                                            | 19.07                     | 1.42 (m)                  |                 |
| b                                              |                           | 1.66 (m)                  |                 |
| 7 a                                            | 33.63                     | 1.96 (dd)                 | 17.6, 6.3       |
| b                                              |                           | 2.06 (m)                  |                 |
| 8                                              | 126.36                    |                           |                 |
| 9                                              | 140.19                    |                           |                 |
| 10                                             | 38.99                     |                           |                 |
| 11                                             | 25.74                     | 2.45 (dt)                 | 11.3, 6.0       |
| 12 a                                           | 28.76                     | 2.13 (dt)                 | 11.3, 6.0       |
| b                                              |                           | 2.27 (td)                 | 12.5, 12.1, 6.0 |
| 13                                             | 125.70                    |                           |                 |
| 14                                             | 110.86                    | 6.30 (br s)               |                 |
| 15                                             | 142.62                    | 7.35 (t)                  | 1.7             |
| 16                                             | 138.40                    | 7.23 (br s)               |                 |
| 17                                             | 19.56                     | 1.61 (s)                  |                 |
| 18                                             | 33.33                     | 0.90 (s)                  |                 |
| 19                                             | 21.71                     | 0.84 (s)                  |                 |
| 20                                             | 20.09                     | 0.96 (s)                  |                 |

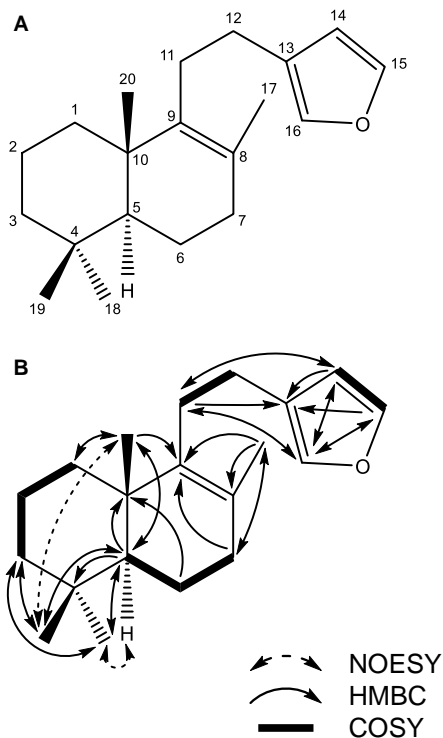

$^{13}\text{C}$  NMR spectrum of **18** (201 MHz,  $\text{CDCl}_3$  solvent).

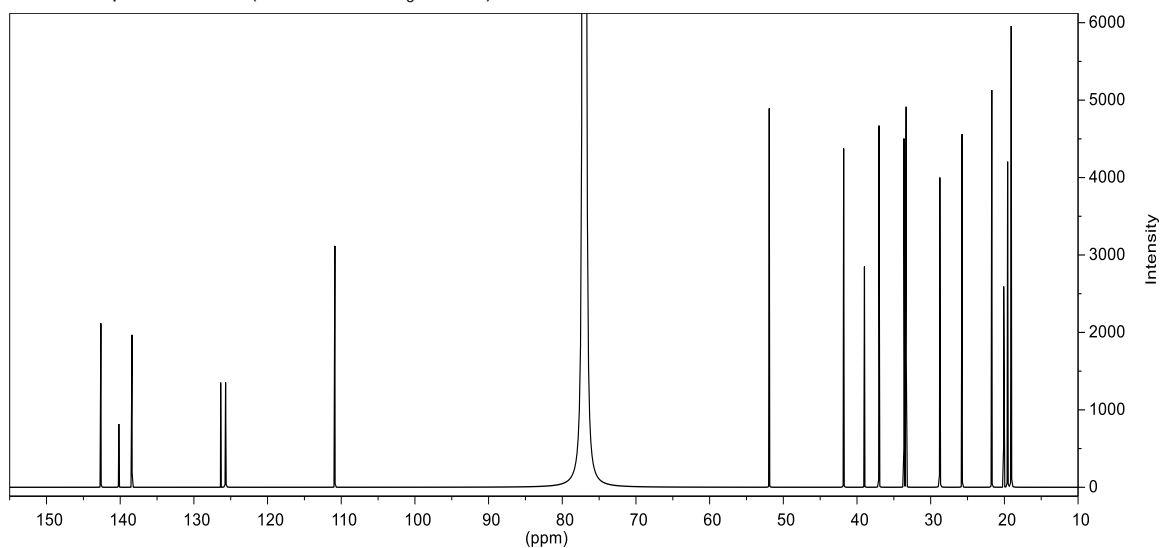

### Supplementary Fig. 5, continued

The majority of the bicyclic decalin  $^{13}\text{C}$  and  $^1\text{H}$  NMR chemical shifts of (**18**) were in agreement (highlighted by \*) with the corresponding class II diTPS product of 8,13-copalol (**15**; Pelot *et al.* (2018) *Plant Physiol.* 178(1):54-71).

|          | ( <b>18</b> )             | ( <b>15</b> )             | ( <b>18</b> )             | ( <b>15</b> )             |
|----------|---------------------------|---------------------------|---------------------------|---------------------------|
| Position | $\delta_{\text{C}}$ (ppm) | $\delta_{\text{C}}$ (ppm) | $\delta_{\text{H}}$ (ppm) | $\delta_{\text{H}}$ (ppm) |
| 1 a      | 37.02*                    | 36.97*                    | 1.21 (td)                 | 1.16 (m)                  |
| b        |                           |                           | 1.87 (m)                  | 1.82 (dt)                 |
| 2 a      | 19.07*                    | 19.07*                    | 1.50 (dt)*                | 1.48 (dt)*                |
| b        |                           |                           | 1.62 (m)*                 | 1.59 (m)*                 |
| 3 a      | 41.81*                    | 41.80*                    | 1.17 (td)                 | 1.15 (m)                  |
| b        |                           |                           | 1.42 (m)*                 | 1.41 (m)*                 |
| 4        | 33.35*                    | 33.33*                    |                           |                           |
| 5        | 51.91*                    | 51.90*                    | 1.15 (dd)*                | 1.12 (dd)*                |
| 6 a      | 19.07*                    | 19.07*                    | 1.42 (m)*                 | 1.40 (m)*                 |
| b        |                           |                           | 1.66 (m)*                 | 1.64 (dd)*                |
| 7 a      | 33.63*                    | 33.64*                    | 1.96 (dd)*                | 1.94 (dd)*                |
| b        |                           |                           | 2.06 (m)*                 | 2.04 (m)*                 |
| 8        | 126.36*                   | 126.04*                   |                           |                           |
| 9        | 140.19*                   | 140.13*                   |                           |                           |
| 10       | 38.99*                    | 39.05*                    |                           |                           |
| 11 a     | 25.74                     | 26.77                     | 2.45 (dt)                 | 1.98 (td)                 |
| b        |                           |                           |                           | 2.12 (td)                 |
| 12 a     | 28.76                     | 40.16                     | 2.13 (dt)                 | 2.05 (m)                  |
| b        |                           |                           | 2.27 (td)                 |                           |
| 13       | 125.70                    | 140.79                    |                           |                           |
| 14       | 110.86                    | 122.60                    | 6.30 (br s)               | 5.43 (tq)                 |
| 15       | 142.62                    | 59.44                     | 7.35 (t)                  | 4.16 (d)                  |
| 16       | 138.40                    | 16.36                     | 7.23 (br s)               | 1.71 (s)                  |
| 17       | 19.56*                    | 19.51*                    | 1.61 (s)*                 | 1.58 (s)*                 |
| 18       | 33.33*                    | 33.32*                    | 0.90 (s)*                 | 0.88 (s)*                 |
| 19       | 21.71*                    | 21.70*                    | 0.84 (s)*                 | 0.83 (s)*                 |
| 20       | 20.09*                    | 20.09*                    | 0.96 (s)*                 | 0.94 (s)*                 |

$^1\text{H}$  NMR spectrum of **18** (800 MHz,  $\text{CDCl}_3$  solvent).

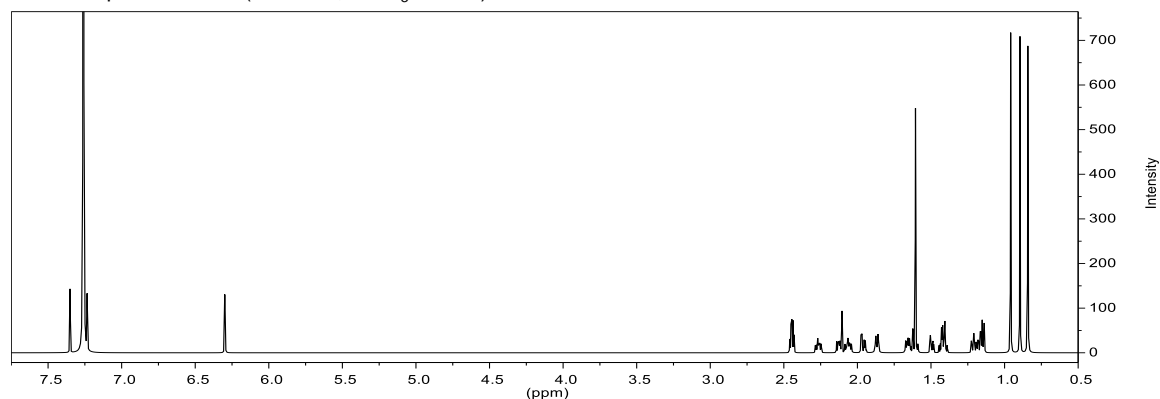

**Supplementary Fig. 6.** NMR analysis of *cis-trans*-15,16-epoxy-cleroda-3,13(16),14-triene (**19**).

Assigned  $^{13}\text{C}$  and  $^1\text{H}$  chemical shifts for **19** (201 MHz and 800 MHz respectively,  $\text{CDCl}_3$  solvent). The structure for **19** was numbered (A) and determined by the selected 2D NMR NOESY, HMBC and COSY correlations (B).

| <i>cis-trans</i> -15,16-epoxy-cleroda-3,13(16),14-triene ( <b>19</b> ) |                           |                           |           |
|------------------------------------------------------------------------|---------------------------|---------------------------|-----------|
| Position                                                               | $\delta_{\text{C}}$ (ppm) | $\delta_{\text{H}}$ (ppm) | J (Hz)    |
| 1 a                                                                    | 20.00                     | 1.62 (m)                  |           |
| b                                                                      |                           | 1.82 (m)                  |           |
| 2 a                                                                    | 25.88                     | 1.94 (m)                  |           |
| b                                                                      |                           | 2.01 (m)                  |           |
| 3                                                                      | 122.44                    | 5.35 (br s)               |           |
| 4                                                                      | 142.15                    |                           |           |
| 5                                                                      | 38.74                     |                           |           |
| 6 a                                                                    | 32.31                     | 1.50 (m)                  |           |
| b                                                                      |                           | 1.63 (m)                  |           |
| 7 a                                                                    | 27.25                     | 1.36 (m)                  |           |
| b                                                                      |                           | 1.43 (m)                  |           |
| 8                                                                      | 37.43                     | 1.60 (m)                  |           |
| 9                                                                      | 38.61                     |                           |           |
| 10                                                                     | 44.62                     | 1.50 (m)                  |           |
| 11 a                                                                   | 38.25                     | 1.39 (td)                 | 13.6, 4.2 |
| b                                                                      |                           | 1.98 (td)                 | 13.6, 4.7 |
| 12 a                                                                   | 18.88                     | 2.33 (td)                 | 13.6, 4.2 |
| b                                                                      |                           | 2.45 (td)                 | 13.6, 4.7 |
| 13                                                                     | 126.10                    |                           |           |
| 14                                                                     | 111.06                    | 6.28 (br s)               |           |
| 15                                                                     | 142.63                    | 7.35 (t)                  | 1.7       |
| 16                                                                     | 138.41                    | 7.21 (br s)               |           |
| 17                                                                     | 15.39                     | 0.88 (d)                  | 7.0       |
| 18                                                                     | 19.35                     | 1.65 (q)                  | 1.8       |
| 19                                                                     | 27.62                     | 1.18 (s)                  |           |
| 20                                                                     | 26.31                     | 1.08 (s)                  |           |

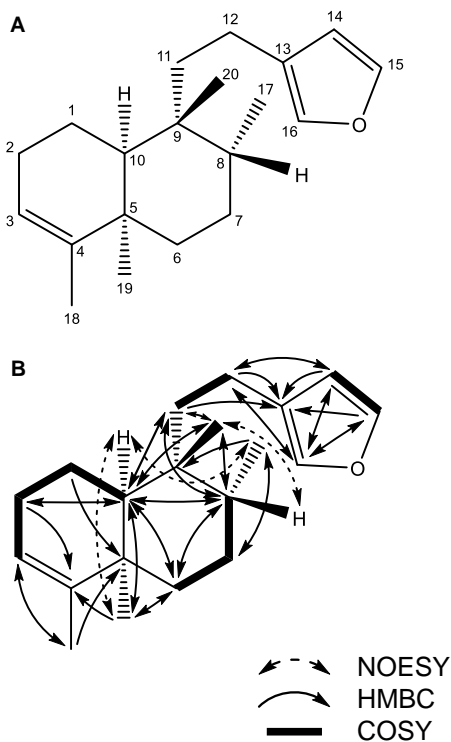

$^{13}\text{C}$  NMR spectrum of **19** (201 MHz,  $\text{CDCl}_3$  solvent).

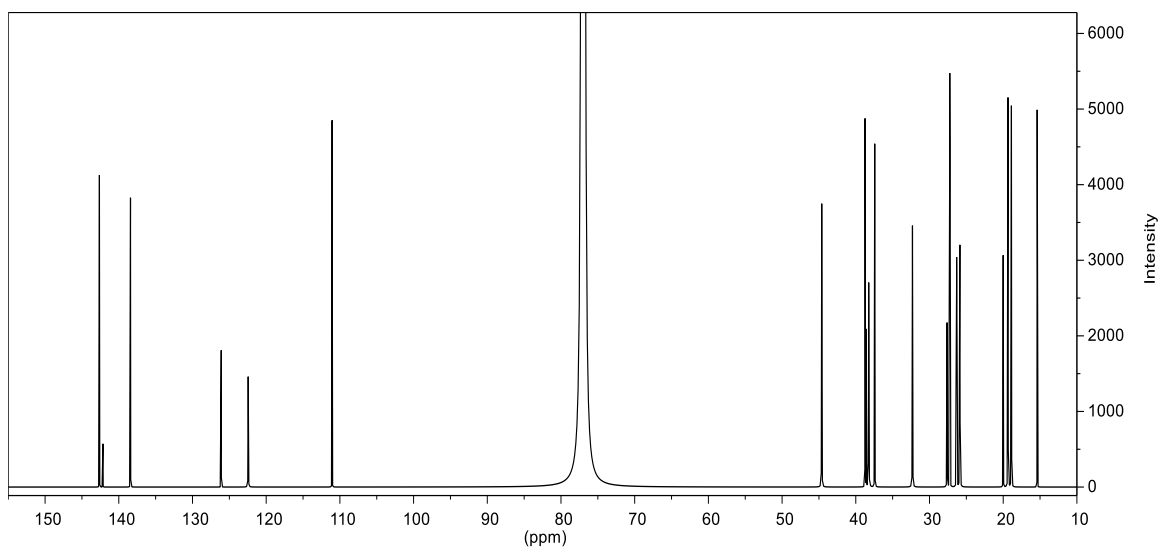



**Supplementary Fig. 6, continued**

The majority of the bicyclic decalin <sup>13</sup>C and <sup>1</sup>H NMR chemical shifts of **19** were in agreement (highlighted by \*) with the corresponding class II diTPS product of *cis-trans*-kolavenol (**16**; Pelot *et al.* (2018) *Plant Physiol.* 178(1):54-71).

|          | (19)             | (16)             | (19)             | (16)             |
|----------|------------------|------------------|------------------|------------------|
| Position | $\delta_c$ (ppm) | $\delta_c$ (ppm) | $\delta_H$ (ppm) | $\delta_H$ (ppm) |
| 1 a      | 20.00*           | 20.01*           | 1.62 (m)*        | 1.60 (m)*        |
| b        |                  |                  | 1.82 (m)*        | 1.80 (m)*        |
| 2 a      | 25.88*           | 25.87*           | 1.94 (m)*        | 1.93 (m)*        |
| b        |                  |                  | 2.01 (m)*        | 1.98 (m)*        |
| 3        | 122.44*          | 122.41*          | 5.35 (br s)*     | 5.34 (br s)*     |
| 4        | 142.15*          | 142.16*          |                  |                  |
| 5        | 38.74*           | 38.77*           |                  |                  |
| 6 a      | 32.31*           | 32.32*           | 1.50 (m)*        | 1.48 (m)*        |
| b        |                  |                  | 1.63 (m)*        | 1.61 (m)*        |
| 7 a      | 27.25*           | 27.25*           | 1.36 (m)*        | 1.35 (m)*        |
| b        |                  |                  | 1.43 (m)*        | 1.41 (m)*        |
| 8        | 37.43*           | 37.50*           | 1.60 (m)*        | 1.56 (m)*        |
| 9        | 38.61*           | 38.59*           |                  |                  |
| 10       | 44.62*           | 44.63*           | 1.50 (m)         | 1.43 (dd)        |
| 11 a     | 38.25            | 36.03            | 1.39 (td)        | 1.23 (td)        |
| b        |                  |                  | 1.98 (td)        | 1.83 (td)        |
| 12 a     | 18.88            | 33.42            | 2.33 (td)        | 1.91 (td)        |
| b        |                  |                  | 2.45 (td)        | 2.05 (td)        |
| 13       | 126.10           | 141.35           |                  |                  |
| 14       | 111.06           | 122.67           | 6.28 (br s)      | 5.42 (tq)        |
| 15       | 142.63           | 59.48            | 7.35 (t)         | 4.16 (d)         |
| 16       | 138.41           | 16.60            | 7.21 (br s)      | 1.70 (br s)      |
| 17       | 15.39*           | 15.38*           | 0.88 (d)*        | 0.86 (d)*        |
| 18       | 19.35*           | 19.35*           | 1.65 (q)*        | 1.64 (q)*        |
| 19       | 27.62*           | 27.71*           | 1.18 (s)*        | 1.15 (s)*        |
| 20       | 26.31*           | 26.41*           | 1.08 (s)*        | 1.02 (s)*        |

<sup>1</sup>H NMR spectrum of **19** (800 MHz, CDCl<sub>3</sub> solvent).

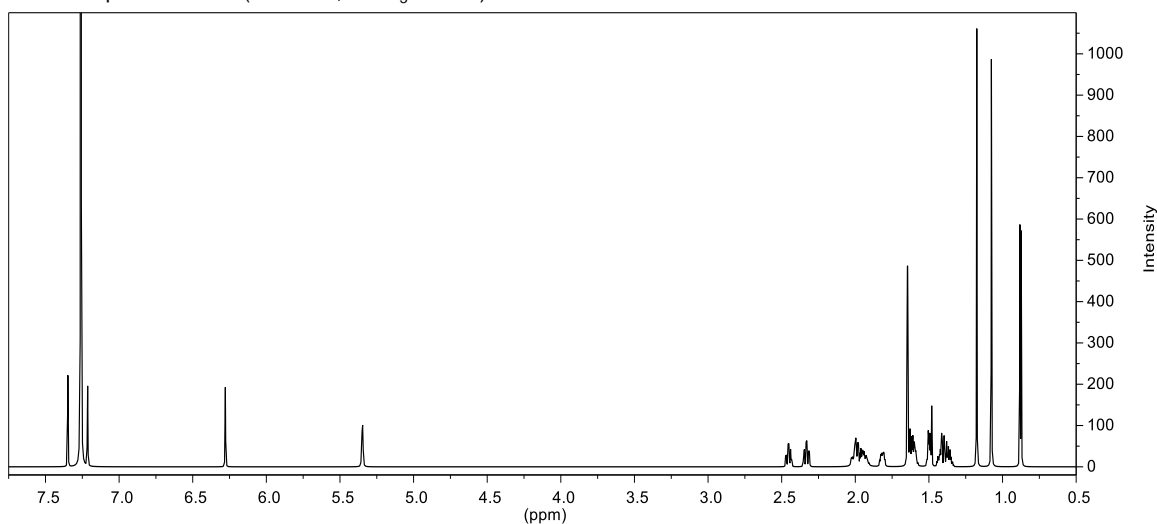

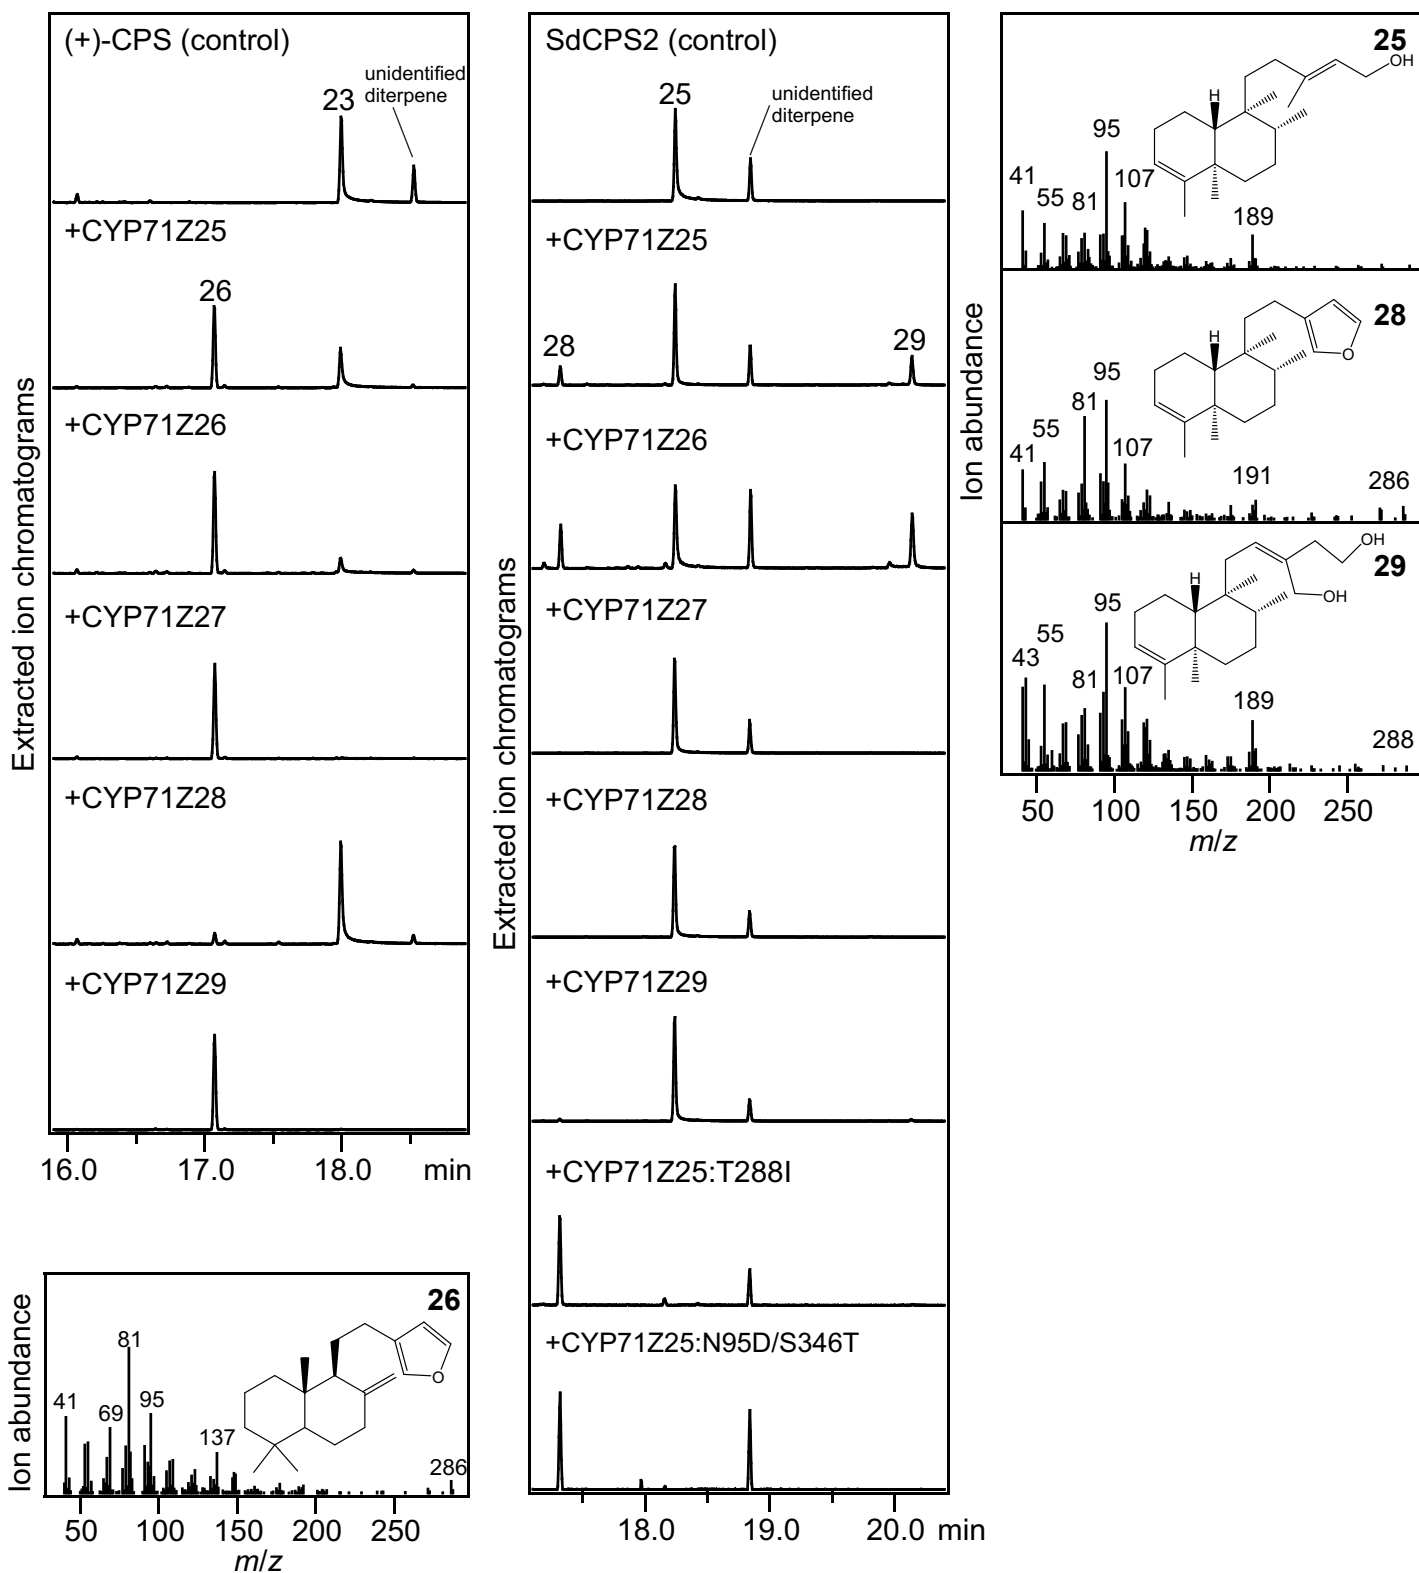

**Supplementary Fig. 7.** Functional characterization of switchgrass P450s. Individually scaled extracted ion GC-MS chromatograms and corresponding mass spectra of reaction products resulting from *E. coli* co-expression assays of the individual constructs of CYP71Z25 and selected P450 variants with class II diTPSs producing (+)-copalol (i.e. dephosphorylated (+)-CPP) or *trans-cis*-kolavenol (i.e. dephosphorylated *trans-cis*-CLPP produced by *Salvia divinorum* CPS2). 23, (+)-copalol (i.e. dephosphorylated (+)-CPP); 25, *trans-cis*-kolavenol (i.e. dephosphorylated *trans-cis*-CLPP); 26, (+)-15,16-epoxy-8(17),13(16),14-triene; 29, *trans-cis*-cleroda-3,12-dien-15,16-diol; 28, predicted furanoditerpenoid derivative of 25. Structures of the furanoditerpenoid product 28 and dihydroxyl product 29 were assigned on the basis of the respective substrate structures.

**Supplementary Fig. 8.** NMR analysis of (+)-15,16-epoxy-8(17),13(16),14-triene (**26**).

Assigned  $^{13}\text{C}$  and  $^1\text{H}$  chemical shifts for **26** (201 MHz and 800 MHz respectively,  $\text{CDCl}_3$  solvent). The structure for **26** was numbered (A) and determined by the selected NMR NOESY, HMBC and COSY correlations (B).

| (+)-15,16-epoxy-8(17),13(16),14-triene ( <b>26</b> ) |                           |                           |           |
|------------------------------------------------------|---------------------------|---------------------------|-----------|
| Position                                             | $\delta_{\text{C}}$ (ppm) | $\delta_{\text{H}}$ (ppm) | J (Hz)    |
| 1 a                                                  | 39.02                     | 0.97 (td)                 | 13.0, 3.9 |
| b                                                    |                           | 1.74 (m)                  |           |
| 2 a                                                  | 19.39                     | 1.47 (m)                  |           |
| b                                                    |                           | 1.56 (m)                  |           |
| 3 a                                                  | 42.66                     | 1.16 (td)                 | 13.4, 4.1 |
| b                                                    |                           | 1.39 (m)                  |           |
| 4                                                    | 33.59                     |                           |           |
| 5                                                    | 55.47                     | 1.07 (dd)                 | 12.6, 2.8 |
| 6 a                                                  | 24.45                     | 1.33 (m)                  |           |
| b                                                    |                           | 1.74 (m)                  |           |
| 7 a                                                  | 38.35                     | 1.98 (td)                 | 13.0, 5.1 |
| b                                                    |                           | 2.40 (m)                  |           |
| 8                                                    | 148.57                    |                           |           |
| 9                                                    | 56.09                     | 1.64 (m)                  |           |
| 10                                                   | 39.61                     |                           |           |
| 11 a                                                 | 24.09                     | 1.61 (m)                  |           |
| b                                                    |                           | 1.76 (m)                  |           |
| 12 a                                                 | 23.62                     | 2.23 (m)                  |           |
| b                                                    |                           | 2.55 (m)                  |           |
| 13                                                   | 125.64                    |                           |           |
| 14                                                   | 111.00                    | 6.26 (m)                  |           |
| 15                                                   | 142.63                    | 7.35 (t)                  | 1.6       |
| 16                                                   | 138.68                    | 7.19 (m)                  |           |
| 17 a                                                 | 106.25                    | 4.56 (m)                  |           |
| b                                                    |                           | 4.86 (m)                  |           |
| 18                                                   | 33.62                     | 0.86 (s)                  |           |
| 19                                                   | 21.74                     | 0.80 (s)                  |           |
| 20                                                   | 14.52                     | 0.68 (s)                  |           |

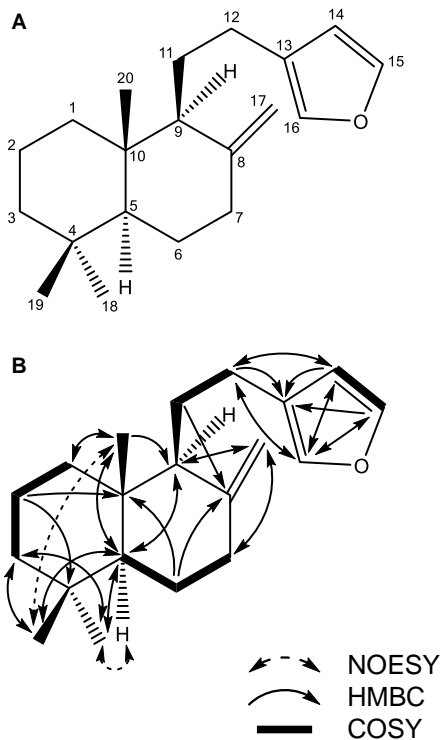

$^{13}\text{C}$  NMR spectrum of **26** (201 MHz,  $\text{CDCl}_3$  solvent).

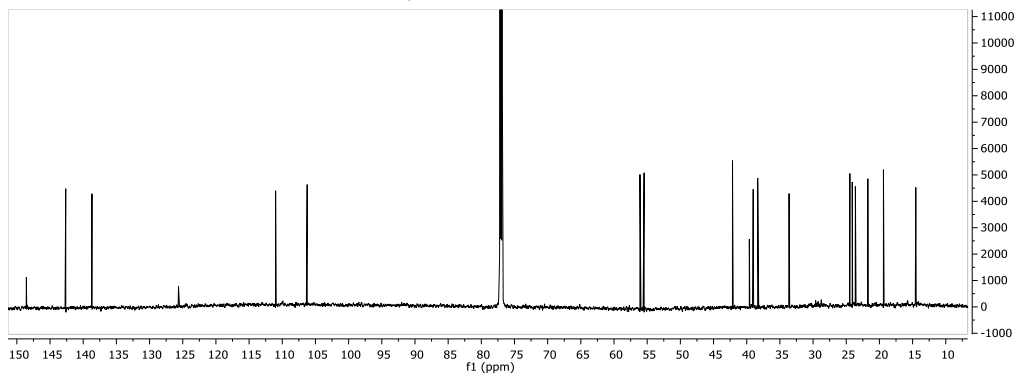

### Supplementary Fig. 8, continued

The majority of the bicyclic decalin  $^{13}\text{C}$  and  $^1\text{H}$  NMR chemical shifts of **26** were in agreement (highlighted by \*) with the corresponding class II diTPS product of (+)-copalol (**23**; Yee & Coates (1992) *J. Org. Chem.* 17, 4598-4608).

$\text{H}_2\text{O}$   
peak

|          | ( <b>26</b> )             | ( <b>23</b> )             | ( <b>26</b> )             | ( <b>23</b> )             |
|----------|---------------------------|---------------------------|---------------------------|---------------------------|
| Position | $\delta_{\text{C}}$ (ppm) | $\delta_{\text{C}}$ (ppm) | $\delta_{\text{H}}$ (ppm) | $\delta_{\text{H}}$ (ppm) |
| 1 a      | 39.02*                    | 39.19*                    | 0.97 (td) *               | 0.99 (td) *               |
| b        |                           |                           | 1.74 (m) *                | 1.72*                     |
| 2 a      | 19.39                     | 21.89                     | 1.47 (m)                  | 1.39*                     |
| b        |                           |                           | 1.56 (m) *                | 1.57*                     |
| 3 a      | 42.66*                    | 42.27*                    | 1.16 (td) *               | 1.16 (td)*                |
| b        |                           |                           | 1.39 (m) *                | 1.37*                     |
| 4        | 33.59*                    | 33.71*                    |                           |                           |
| 5        | 55.47*                    | 55.63*                    | 1.07 (dd) *               | 1.07 (dd)*                |
| 6 a      | 24.45*                    | 24.56*                    | 1.33 (m) *                | 1.30*                     |
| b        |                           |                           | 1.74 (m) *                | 1.70*                     |
| 7 a      | 38.35*                    | 38.47*                    | 1.98 (td) *               | 1.96 (td)*                |
| b        |                           |                           | 2.40 (m) *                | 2.38*                     |
| 8        | 148.57*                   | 148.74*                   |                           |                           |
| 9        | 56.09*                    | 56.40*                    | 1.64 (m)                  | 1.54                      |
| 10       | 39.61*                    | 39.77*                    |                           |                           |
| 11 a     | 24.09                     | 19.52                     | 1.61 (m)                  | 1.45                      |
| b        |                           |                           | 1.76 (m)                  | 1.60                      |
| 12 a     | 23.62                     | 38.55                     | 2.23 (m)                  | 1.79                      |
| b        |                           |                           | 2.55 (m)                  | 2.15                      |
| 13       | 125.64                    | 140.78                    |                           |                           |
| 14       | 111.00                    | 123.05                    | 6.26 (m)                  | 5.38 (tq)                 |
| 15       | 142.63                    | 59.54                     | 7.35 (t)                  | 4.15 (d)                  |
| 16       | 138.68                    | 16.49                     | 7.19 (m)                  | 1.65                      |
| 17 a     | 106.25*                   | 106.38*                   | 4.56 (m) *                | 4.50 (br d)*              |
| b        |                           |                           | 4.86 (m) *                | 4.82 (app q)*             |
| 18       | 33.62*                    | 33.75*                    | 0.86 (s) *                | 0.86*                     |
| 19       | 21.74*                    | 21.86*                    | 0.80 (s) *                | 0.79*                     |
| 20       | 14.52*                    | 14.62*                    | 0.68 (s) *                | 0.67*                     |

$^1\text{H}$  NMR spectrum of **26** (800 MHz,  $\text{CDCl}_3$  solvent). (Note peak 1.55 represents probably water impurity)

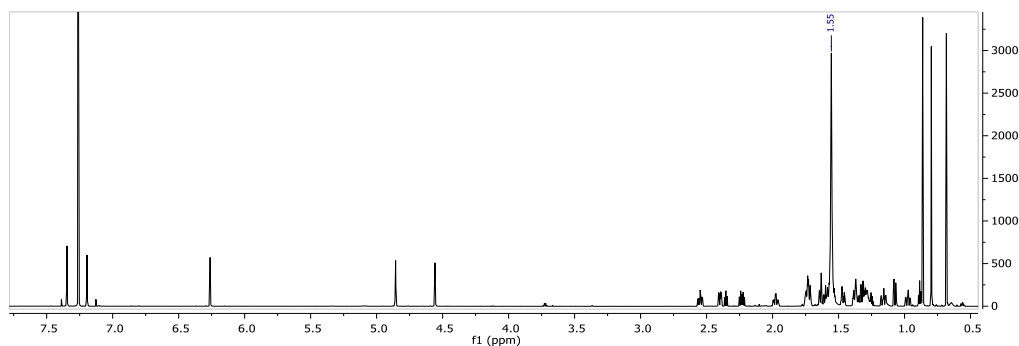

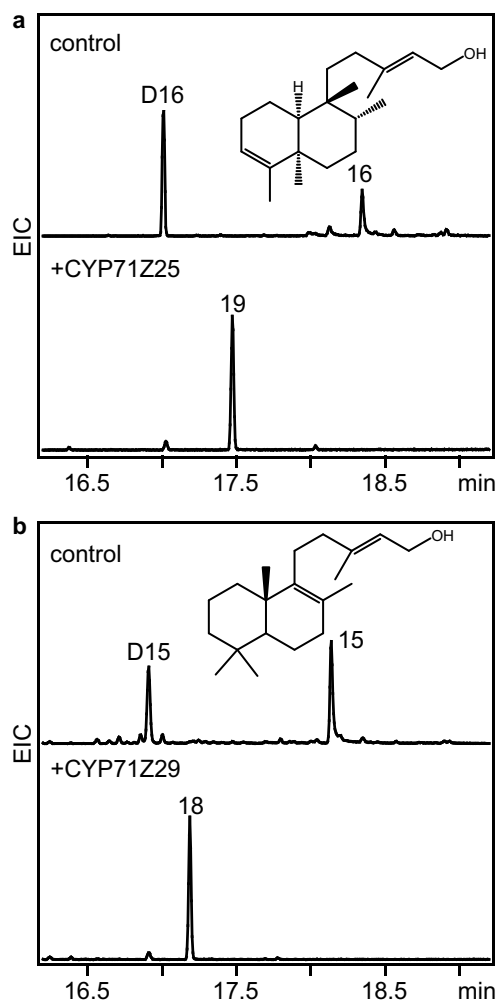

**Supplementary Figure 9.** Substrate-specificity of switchgrass CYP71Z25-29. Individually scaled extracted ion GC-MS chromatograms of enzyme products resulting from *E. coli* expression of CYP71Z25 or CYP71Z29 with purified diterpenoid alcohol substrates added to the culture. **(a)** *E. coli* expression of CYP71Z25 with purified 16 (dephosphorylated 11) added as a substrate. Compound D16 is a derivative of 16 presumably through isomerization during the *E. coli* expression. **(b)** *E. coli* expression of CYP71Z29 with purified 15 (dephosphorylated 10) added as a substrate. Compound D15 is a putative derivative of 15 presumably through isomerization during the *E. coli* expression.

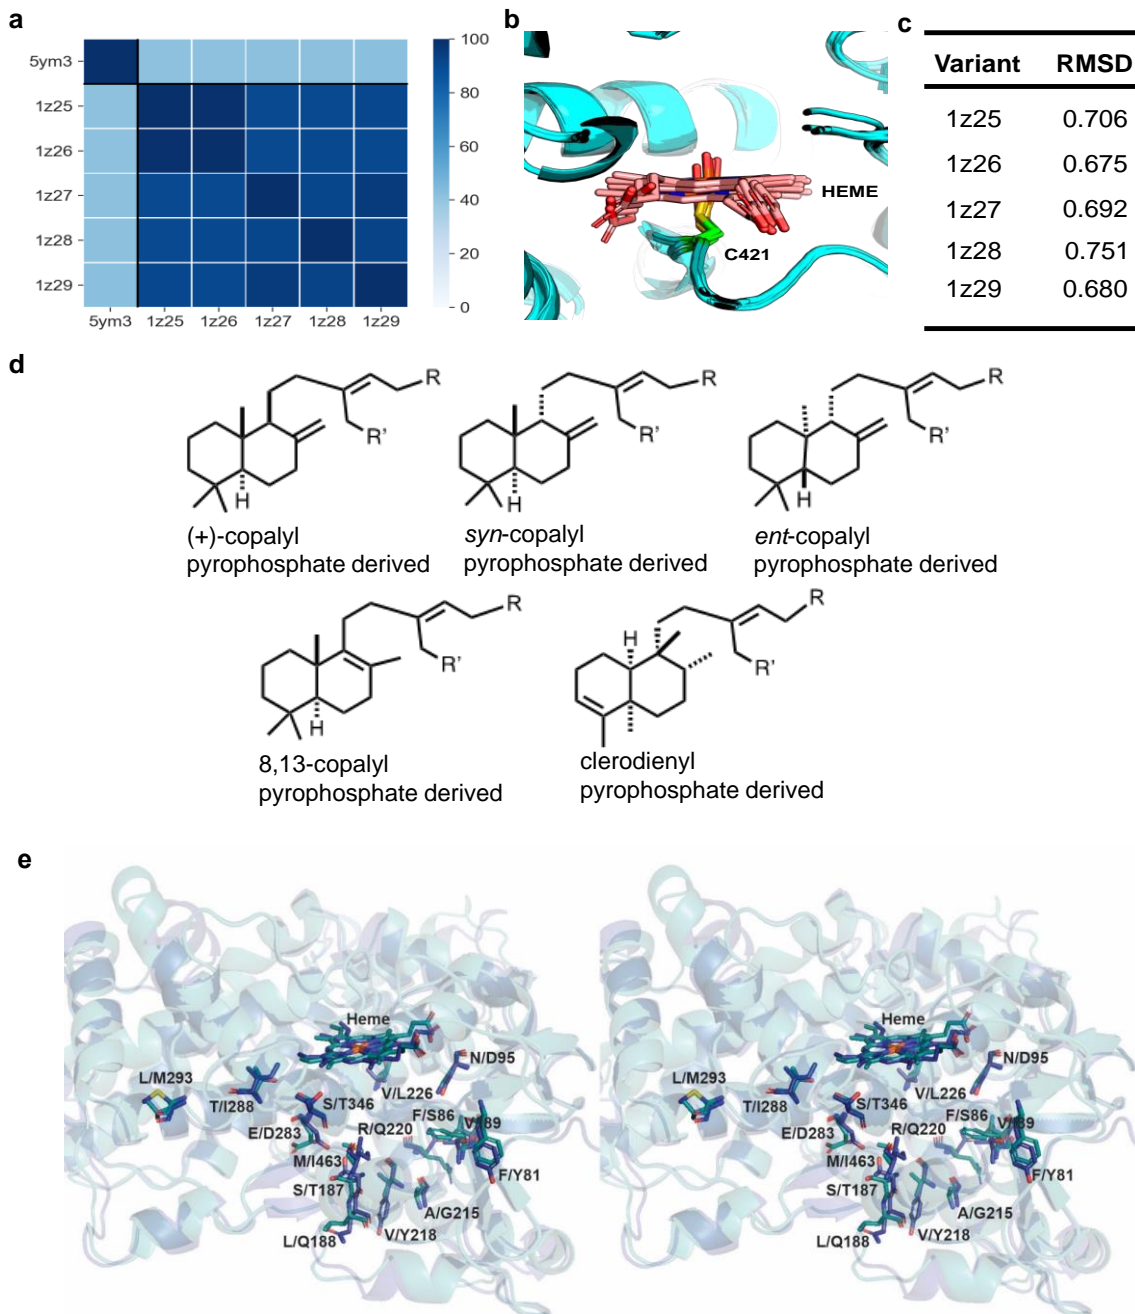

**Supplementary Fig. 10:** Structural analysis of CYP71Z25-29. **(a)** Heatmap of pairwise identity between the template (*Salvia miltiorrhiza* CYP76AH155; PDB-ID 5YM3) and CYP71Z25-29, and between each P450 variant. **(b)** Overlay of each CYP71Z25-29 models active site (teal, template gray) with heme (pink) and residue C421 (green). **(c)** RMSD (root-mean-square deviation) values of the generated structural models of CYP71Z25-29 as compared to the template **(d)** Structures of the three possible substitution arrangements (15-hydroxy, R=OH, R'=H; 15-pyrophosphate, R=OPP, R'=H; 15,16-dihydroxy, R=OH, R'=OH for all five P450 substrates investigated via ligand docking in this study. **(e)** Stereo view representation of a structural overlay of homology models of CYP71Z25 (teal) and CYP71Z29 (blue), illustrating active site residues targeted for site-directed mutagenesis in this study.

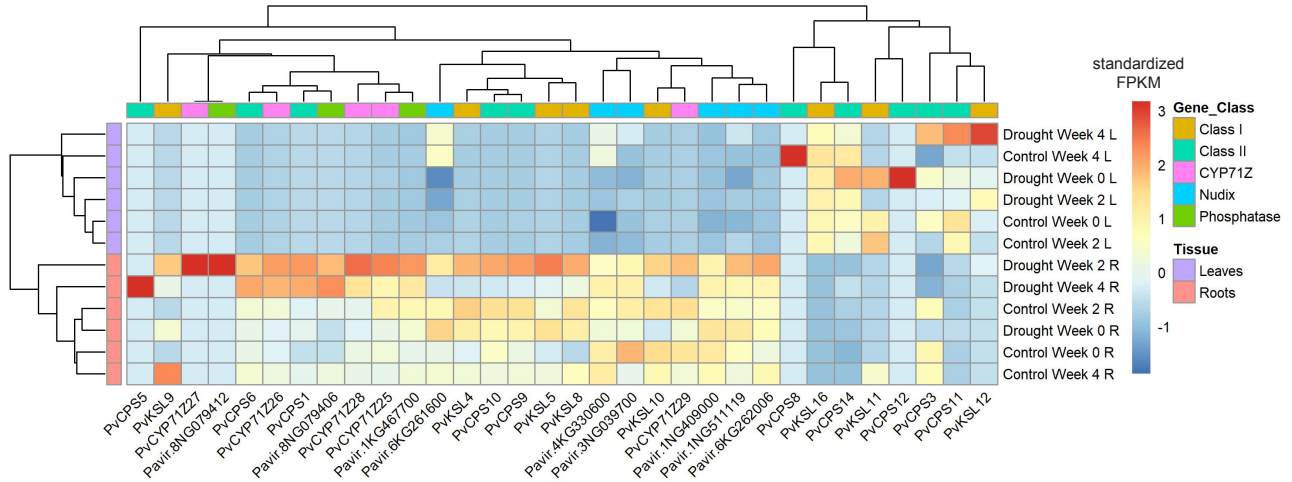

**Supplemental Figure 11.** Hierarchical cluster analysis of the gene expression of a predicted dolichyldiphosphatase (*Pavir.1KG467700*), two putative phosphoserine phosphatases (*Pavir.8NG079406*, *Pavir.8NG079412*) and putative Nudix hydrolase genes (*Pavir.6KG261600*, *Pavir.4KG330600*, *Pavir.3NG039700*, *Pavir.1NG409000*, *Pavir.1NG511119*, *Pavir.6KG262006*) as compared to select diTPS and CYP71Z25-29 gene expression profiles from drought stressed switchgrass tissues. Samples were collected before starting treatment (W0), two weeks (W2), and four weeks (W4) of drought stress treatment. L=leaves, R=roots, Drought stressed=D, well-watered=C.
